# Supplementary material for: Anionic stitching polymerization of styryl(vinyl)silanes for the synthesis of sila-cyclic olefin polymers
Source: Royal Society of Chemistry journal article supplement (doi:10.1039/d2cc00721e), 2022-01-01
Supplement: d2cc00721e1.pdf [file d2cc00721e1.pdf]

**Electronic Supplementary Information**  
**for**  
**Anionic stitching polymerization of styryl(vinyl)silanes**  
**for the synthesis of sila-cyclic olefin polymers**

Sho Ikeda and Ryo Shintani\*

*Division of Chemistry, Department of Materials Engineering Science, Graduate School of Engineering Science, Osaka University, Toyonaka, Osaka 560-8531, Japan*

|                                                                   |            |
|-------------------------------------------------------------------|------------|
| <b>I. General</b>                                                 | <b>S2</b>  |
| <b>II. Synthesis of Monomers</b>                                  | <b>S3</b>  |
| <b>III. Stoichiometric Reactions and Polymerization Reactions</b> | <b>S7</b>  |
| <b>IV. UV-vis Absorption and Transmittance Spectra</b>            | <b>S28</b> |
| <b>V. <sup>1</sup>H and <sup>13</sup>C NMR Spectra</b>            | <b>S29</b> |
| <b>VI. References</b>                                             | <b>S47</b> |

## I. General

All air- and moisture-sensitive manipulations were carried out with standard Schlenk techniques under nitrogen. Preparative GPC was performed with JAI LC-9201 or LaboACE LC-5060 equipped with JAIGEL-2HR columns using  $\text{CHCl}_3$  as an eluent. NMR spectra were recorded on JEOL JNM-ECS400 or Agilent Unity-Inova500 spectrometers. Size-exclusion chromatography analyses were performed with JASCO-RI4030 (refractive index detector), JASCO-PU4180 (RHPLC pump), and CO-4060 (column oven) equipped with Shodex GPC LF-804 columns using THF as an eluent, and the molecular weights were calibrated against standard polystyrene samples. High resolution mass spectra were recorded on JEOL JMS700 spectrometer. Thermogravimetric analyses were performed with SII Exstar TG/DTA6200 under nitrogen atmosphere. The glass-transition temperatures were monitored with SII Exstar DSC6200 under nitrogen atmosphere. UV-vis absorption and transmittance spectra were recorded on HITACHI U-2900 spectrophotometer. Film thickness was measured with surfcoorder ET200.

THF (Kanto Chemical; dehydrated), toluene (Kanto Chemical; dehydrated), and  $\text{CH}_2\text{Cl}_2$  (Kanto Chemical; dehydrated) were degassed by purging nitrogen prior to use. Styrene (TCI) and trimethyl(vinyl)silane (Wako Chemicals) were distilled over  $\text{CaH}_2$  under vacuum prior to polymerization. **1**, **6**, and dimethyldivinylsilane (TCI) were dried over microwave-activated molecular sieves 4A 1/16 (Wako Chemicals) prior to polymerization.  $\beta$ -Bromostyrene (TCI), chlorodimethyl(vinyl)silane (TCI), chlorodimethylsilane (TCI), dichlorodimethylsilane (TCI), vinylmagnesium bromide (Aldrich; 1.0 M solution in THF), ethynylmagnesium bromide (Aldrich; 0.5 M solution in THF), *n*BuLi (Kanto Chemical; 1.57 M solution in hexane), *sec*BuLi (Kanto Chemical; 1.23 M solution in cyclohexane/hexane), platinum(0)-1,3-divinyltetramethyldisiloxane complex (TCI; 19.0–21.5% Pt in 1,3-divinyltetramethylsiloxane), and Mg turnings (Nacalai Tesque), were used as received. 1-Ethynyl-naphthalene was synthesized following the literature procedure.<sup>1</sup>

## II. Synthesis of Monomers

### Representative Procedures:

#### (*E*)-Dimethyl(styryl)(vinyl)silane (**1a**)

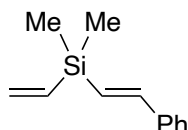

A solution of  $\beta$ -bromostyrene (4.96 g, 27.1 mmol) in THF (10 mL) was added dropwise over 30 min to a suspension of Mg turnings (481 mg, 19.8 mmol) in THF (10 mL), and the mixture was stirred for 2 h at room temperature. The resulting solution was added over 2 min to a solution of chlorodimethyl(vinyl)silane (1.30 mL, 9.59 mmol) in THF (10 mL) and the mixture was stirred for 3 h at room temperature. The reaction was quenched with saturated  $\text{NH}_4\text{Cl}$  aq and this was extracted with  $\text{Et}_2\text{O}$ . The organic layer was washed with saturated  $\text{NaCl}$  aq, dried over  $\text{MgSO}_4$ , filtered, and concentrated under vacuum. The residue was chromatographed on silica gel with hexane and further purified by GPC with  $\text{CHCl}_3$  to afford compound **1a** as a colorless oil (1.53 g, 8.12 mmol; 85% yield).

$^1\text{H}$  NMR ( $\text{CDCl}_3$ ):  $\delta$  7.44 (d,  $^3J_{\text{HH}} = 7.8$  Hz, 2H), 7.33 (t,  $^3J_{\text{HH}} = 7.6$  Hz, 2H), 7.28-7.21 (m, 1H), 6.91 (d,  $^3J_{\text{HH}} = 19.2$  Hz, 1H), 6.46 (d,  $^3J_{\text{HH}} = 19.3$  Hz, 1H), 6.23 (dd,  $^3J_{\text{HH}} = 20.1$  and 14.7 Hz, 1H), 6.02 (dd,  $^3J_{\text{HH}} = 14.6$  Hz and  $^2J_{\text{HH}} = 3.6$  Hz, 1H), 5.76 (dd,  $^3J_{\text{HH}} = 20.1$  Hz and  $^2J_{\text{HH}} = 4.1$  Hz, 1H), 0.24 (s, 6H).  $^{13}\text{C}\{^1\text{H}\}$  NMR ( $\text{CDCl}_3$ ):  $\delta$  145.0, 138.4, 132.5, 128.7, 128.2, 127.4, 126.6, -2.8.  $^{29}\text{Si}\{^1\text{H}\}$  NMR ( $\text{CDCl}_3$ ): -13.14. HRMS (EI) calcd for  $\text{C}_{12}\text{H}_{16}\text{Si}$  ( $\text{M}^+$ ) 188.1016, found 188.1017.

#### (*E*)-Dimethyl(2-(1-naphthyl)vinyl)(vinyl)silane (**1d**)

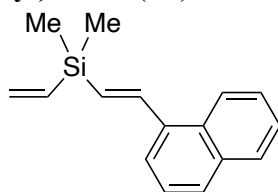

Platinum(0)-1,3-divinyltetramethyldisiloxane complex (25.0 mg, ca. 26  $\mu\text{mol}$ ; 19.0–21.5% Pt in 1,3-divinyltetramethylsiloxane) was added to a solution of chlorodimethylsilane (544  $\mu\text{L}$ , 5.00 mmol) and 1-ethynynaphthalene (761 mg, 5.00 mmol) in toluene (5 mL), and the mixture was stirred for 2 h at room temperature. Vinylmagnesium bromide (5.00 mL, 5.00 mmol; 1.0 M solution in THF) was added to the resulting solution, and the mixture was stirred for 2 h at room temperature. The reaction was quenched with saturated  $\text{NH}_4\text{Cl}$  aq and this was extracted with  $\text{Et}_2\text{O}$ . The organic layer was washed with saturated  $\text{NaCl}$  aq, dried over  $\text{MgSO}_4$ , filtered, and concentrated under vacuum. The residue was chromatographed on silica gel with hexane and further purified by GPC with  $\text{CHCl}_3$  to afford compound **1d** as a colorless oil (699 mg, 2.93 mmol; 59% yield).

$^1\text{H}$  NMR ( $\text{CDCl}_3$ ):  $\delta$  8.16 (d,  $^3J_{\text{HH}} = 8.5$  Hz, 1H), 7.85 (d,  $^3J_{\text{HH}} = 7.3$  Hz, 1H), 7.79 (d,  $^3J_{\text{HH}} = 8.0$  Hz, 1H), 7.71 (d,  $^3J_{\text{HH}} = 19.0$  Hz, 1H), 7.68 (d,  $^3J_{\text{HH}} = 7.0$  Hz, 1H), 7.55-7.43 (m, 3H), 6.54 (d,  $^3J_{\text{HH}} = 18.9$  Hz, 1H), 6.29 (dd,  $^3J_{\text{HH}} = 20.2$  and 14.5 Hz, 1H), 6.07 (dd,  $^3J_{\text{HH}} = 14.6$  Hz and  $^2J_{\text{HH}} = 3.9$  Hz, 1H),

5.83 (dd,  $^3J_{\text{HH}} = 20.4$  Hz and  $^2J_{\text{HH}} = 3.9$  Hz, 1H), 0.31 (s, 6H).  $^{13}\text{C}\{^1\text{H}\}$  NMR ( $\text{CDCl}_3$ ):  $\delta$  142.4, 138.5, 136.8, 134.0, 132.6, 131.8, 131.3, 128.7, 128.4, 126.2, 125.9, 125.8, 123.9, 123.8,  $-2.6$ .  $^{29}\text{Si}\{^1\text{H}\}$  NMR ( $\text{CDCl}_3$ ):  $-13.16$ . HRMS (EI) calcd for  $\text{C}_{16}\text{H}_{18}\text{Si}$  ( $\text{M}^+$ ) 238.1172, found 238.1178.

**(E)-Trimethyl(styryl)silane (3)** (CAS 19372-00-0)

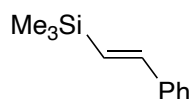

A solution of  $\beta$ -bromostyrene (3.66 g, 20.0 mmol) in THF (10 mL) was added dropwise over 15 min to a suspension of Mg turnings (486 mg, 20.0 mmol) in THF (10 mL), and the mixture was stirred for 1 h at room temperature. The resulting solution was added over 5 min to chlorotrimethylsilane (1.27 mL, 10.0 mmol) and the mixture was stirred for 1 h at room temperature. The reaction was quenched with saturated  $\text{NH}_4\text{Cl}$  and this was extracted with  $\text{Et}_2\text{O}$ . The organic layer was washed with saturated  $\text{NaCl}$ , dried over  $\text{MgSO}_4$ , filtered, and concentrated under vacuum. The residue was chromatographed on silica gel with hexane and further purified by GPC with  $\text{CHCl}_3$  to afford compound **3** as a colorless oil (1.00 g, 5.67 mmol; 57% yield).

$^1\text{H}$  NMR ( $\text{CDCl}_3$ ):  $\delta$  7.44 (d,  $^3J_{\text{HH}} = 7.4$  Hz, 2H), 7.33 (t,  $^3J_{\text{HH}} = 7.3$  Hz, 2H), 7.28-7.22 (m, 1H), 6.88 (d,  $^3J_{\text{HH}} = 19.2$  Hz, 1H), 6.48 (d,  $^3J_{\text{HH}} = 19.3$  Hz, 1H), 0.16 (s, 9H).  $^{13}\text{C}\{^1\text{H}\}$  NMR ( $\text{CDCl}_3$ ):  $\delta$  143.7, 138.5, 129.7, 128.7, 128.1, 126.5,  $-1.1$ .

**((E)-2-(Dimethyl((E)-styryl)silyl)vinyl)dimethyl(vinyl)silane (6)**

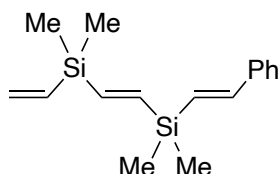

A solution of  $\beta$ -bromostyrene (4.03 g, 22.0 mmol) in THF (10 mL) was added dropwise over 5 min to a suspension of Mg turnings (534 mg, 22.0 mmol) in THF (10 mL), and the mixture was stirred for 1 h at room temperature. The resulting solution was added over 5 min to dichlorodimethylsilane (1.20 mL, 10.0 mmol), and the mixture was stirred for 1 h at room temperature. Ethynylmagnesium bromide (20.0 mL, 10.0 mmol; 0.5 M in THF) was then added to the resulting solution, and the mixture was stirred for 1 h at room temperature. The reaction was quenched with saturated  $\text{NH}_4\text{Cl}$  and this was extracted with  $\text{Et}_2\text{O}$ . The organic layer was washed with saturated  $\text{NaCl}$ , dried over  $\text{MgSO}_4$ , filtered, and concentrated under vacuum. The residue was chromatographed on silica gel with hexane and further purified by GPC with  $\text{CHCl}_3$  to afford (*E*)-ethynyldimethyl(styryl)silane as a colorless oil (849 mg, 4.56 mmol; 46% yield).

$^1\text{H}$  NMR ( $\text{CDCl}_3$ ):  $\delta$  7.46 (d,  $^3J_{\text{HH}} = 7.3$  Hz, 2H), 7.34 (t,  $^3J_{\text{HH}} = 7.3$  Hz, 2H), 7.27 (t,  $^3J_{\text{HH}} = 6.9$  Hz, 1H), 7.06 (d,  $^3J_{\text{HH}} = 19.2$  Hz, 1H), 6.40 (d,  $^3J_{\text{HH}} = 18.7$  Hz, 1H), 2.49 (s, 1H), 0.35 (s, 6H).  $^{13}\text{C}\{^1\text{H}\}$  NMR ( $\text{CDCl}_3$ ):  $\delta$  146.2, 138.0, 128.7, 128.6, 126.8, 124.8, 94.4, 88.5,  $-1.1$ .

Platinum(0)-1,3-divinyltetramethyldisiloxane complex (34.4 mg, ca. 35  $\mu\text{mol}$ ; 19.0–21.5% Pt in 1,3-divinyltetramethylsiloxane) was added to a solution of chlorodimethylsilane (370  $\mu\text{L}$ , 3.40 mmol) and (*E*)-ethynyldimethyl(styryl)silane (641 mg, 3.44 mmol) in toluene (3 mL), and the mixture was stirred for 17.5 h at room temperature. Vinylmagnesium bromide (3.40 mL, 3.40 mmol; 1.0 M solution in THF) was added to the resulting solution, and the mixture was stirred for 2 h at room temperature. The reaction was quenched with saturated  $\text{NH}_4\text{Cl}$  and this was extracted with  $\text{Et}_2\text{O}$ . The organic layer was washed with saturated  $\text{NaCl}$ , dried over  $\text{MgSO}_4$ , filtered, and concentrated under vacuum. The residue was chromatographed on silica gel with hexane and further purified by GPC with  $\text{CHCl}_3$  to afford compound **6** as a colorless oil (637 mg, 2.34 mmol; 69% yield).

$^1\text{H}$  NMR ( $\text{CDCl}_3$ ):  $\delta$  7.44 (d,  $^3J_{\text{HH}} = 7.3$  Hz, 2H), 7.33 (t,  $^3J_{\text{HH}} = 7.6$  Hz, 2H), 7.30-7.22 (m, 1H), 6.89 (d,  $^3J_{\text{HH}} = 19.2$  Hz, 1H), 6.73-6.63 (m, 2H), 6.46 (d,  $^3J_{\text{HH}} = 19.2$  Hz, 1H), 6.17 (dd,  $^3J_{\text{HH}} = 20.1$  and 14.7 Hz, 1H), 5.99 (dd,  $^3J_{\text{HH}} = 14.7$  Hz and  $^2J_{\text{HH}} = 4.2$  Hz, 1H), 5.70 (dd,  $^3J_{\text{HH}} = 20.1$  Hz and  $^2J_{\text{HH}} = 4.1$  Hz, 1H), 0.23 (s, 6H), 0.16 (s, 6H).  $^{13}\text{C}\{^1\text{H}\}$  NMR ( $\text{CDCl}_3$ ):  $\delta$  150.3, 150.2, 144.8, 138.4, 132.3, 128.7, 128.2, 127.6, 126.6, -2.8, -3.2.  $^{29}\text{Si}\{^1\text{H}\}$  NMR ( $\text{CDCl}_3$ ): -13.93, -14.45. HRMS (EI) calcd for  $\text{C}_{16}\text{H}_{24}\text{Si}_2$  ( $\text{M}^+$ ) 272.1411, found 272.1417.

#### Analytical Data for Other Monomers:

##### (*E*)-(3-Methoxystyryl)dimethyl(vinyl)silane (1b)

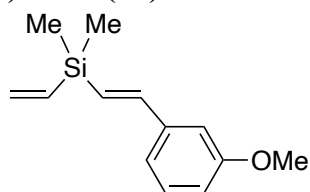

$^1\text{H}$  NMR ( $\text{CDCl}_3$ ):  $\delta$  7.24 (t,  $^3J_{\text{HH}} = 7.9$  Hz, 1H), 7.03 (d,  $^3J_{\text{HH}} = 7.5$  Hz, 1H), 6.98 (dd,  $^4J_{\text{HH}} = 2.6$  and 1.5 Hz, 1H), 6.88 (d,  $^3J_{\text{HH}} = 19.0$  Hz, 1H), 6.82 (ddd,  $^3J_{\text{HH}} = 8.3$  Hz and  $^4J_{\text{HH}} = 2.7$  and 1.0 Hz, 1H), 6.45 (d,  $^3J_{\text{HH}} = 19.2$  Hz, 1H), 6.22 (dd,  $^3J_{\text{HH}} = 20.2$  and 14.6 Hz, 1H), 6.02 (dd,  $^3J_{\text{HH}} = 14.6$  Hz and  $^2J_{\text{HH}} = 3.7$  Hz, 1H), 5.76 (dd,  $^3J_{\text{HH}} = 20.4$  Hz and  $^2J_{\text{HH}} = 3.9$  Hz, 1H), 3.83 (s, 3H), 0.24 (s, 6H).  $^{13}\text{C}\{^1\text{H}\}$  NMR ( $\text{CDCl}_3$ ):  $\delta$  160.0, 144.8, 139.9, 138.3, 132.6, 129.6, 127.8, 119.4, 114.2, 111.5, 55.4, -2.8.  $^{29}\text{Si}\{^1\text{H}\}$  NMR ( $\text{CDCl}_3$ ): -13.14. HRMS (FAB) calcd for  $\text{C}_{13}\text{H}_{18}\text{OSi}$  ( $\text{M}^+$ ) 218.1121, found 218.1119.

##### (*E*)-(4-Methoxystyryl)dimethyl(vinyl)silane (1c)

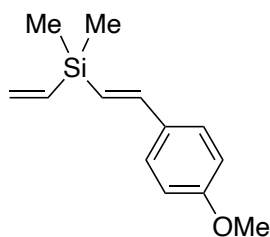

$^1\text{H}$  NMR ( $\text{CDCl}_3$ ):  $\delta$  7.38 (d,  $^3J_{\text{HH}} = 8.8$  Hz, 2H), 6.86 (d,  $^3J_{\text{HH}} = 8.5$  Hz, 2H), 6.85 (d,  $^3J_{\text{HH}} = 19.0$  Hz, 1H), 6.28 (d,  $^3J_{\text{HH}} = 19.2$  Hz, 1H), 6.22 (dd,  $^3J_{\text{HH}} = 20.4$  and 14.6 Hz, 1H), 6.01 (dd,  $^3J_{\text{HH}} = 14.6$

Hz and  $^2J_{\text{HH}} = 3.9$  Hz, 1H), 5.75 (dd,  $^3J_{\text{HH}} = 20.4$  Hz and  $^2J_{\text{HH}} = 3.9$  Hz, 1H), 3.81 (s, 3H), 0.22 (s, 6H).  $^{13}\text{C}\{^1\text{H}\}$  NMR ( $\text{CDCl}_3$ ):  $\delta$  159.8, 144.4, 138.7, 132.3, 131.4, 127.8, 124.5, 114.0, 55.4,  $-2.7$ .  $^{29}\text{Si}\{^1\text{H}\}$  NMR ( $\text{CDCl}_3$ ):  $-13.35$ . HRMS (EI) calcd for  $\text{C}_{13}\text{H}_{18}\text{OSi}$  ( $\text{M}^+$ ) 218.1121, found 218.1123.

**(E)-Dimethyl(2-(1-pyrenyl)vinyl)(vinyl)silane (1e)**

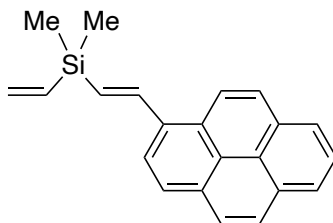

$^1\text{H}$  NMR ( $\text{CDCl}_3$ ):  $\delta$  8.44 (d,  $^3J_{\text{HH}} = 9.2$  Hz, 1H), 8.26 (d,  $^3J_{\text{HH}} = 8.2$  Hz, 1H), 8.20-8.08 (m, 4H), 8.07-7.96 (m, 4H), 6.75 (d,  $^3J_{\text{HH}} = 18.8$  Hz, 1H), 6.35 (dd,  $^3J_{\text{HH}} = 20.6$  and  $14.7$  Hz, 1H), 6.11 (dd,  $^3J_{\text{HH}} = 14.7$  Hz and  $^2J_{\text{HH}} = 3.7$  Hz, 1H), 5.88 (dd,  $^3J_{\text{HH}} = 20.1$  Hz and  $^2J_{\text{HH}} = 3.7$  Hz, 1H), 0.37 (s, 6H).  $^{13}\text{C}\{^1\text{H}\}$  NMR ( $\text{CDCl}_3$ ):  $\delta$  141.9, 138.4, 133.2, 132.8, 131.8, 131.6, 131.2, 131.0, 128.1, 127.7, 127.6, 127.5, 126.1, 125.4, 125.2, 125.12, 125.08, 123.9, 123.0,  $-2.6$ .  $^{29}\text{Si}\{^1\text{H}\}$  NMR ( $\text{CDCl}_3$ ):  $-12.89$ . HRMS (FAB) calcd for  $\text{C}_{22}\text{H}_{20}\text{Si}$  ( $\text{M}^+$ ) 312.1329, found 312.1327.

### III. Stoichiometric Reactions and Polymerization Reactions

#### Procedure for Equation 1.

*n*BuLi (200  $\mu$ L, 0.314 mmol; 1.57 M solution in hexane) was added to a solution of compound **1a** (59.1 mg, 0.314 mmol) in THF (0.5 mL) at  $-78$   $^{\circ}$ C. The mixture was warmed to  $-50$   $^{\circ}$ C and stirred for 3 h at  $-50$   $^{\circ}$ C. The reaction was quenched with MeOH (0.5 mL) and the mixture was concentrated under vacuum to give crude hexyldimethyl(styryl)silane (**2**) (CAS 96816-06-7). The yield was determined to be 68% by  $^1$ H NMR against an internal standard ( $\text{CH}_3\text{NO}_2$ ). For analytical purpose, this was purified by GPC with  $\text{CHCl}_3$ .

$^1$ H NMR ( $\text{CDCl}_3$ ):  $\delta$  7.46-7.42 (m, 2H), 7.33 (t,  $^3J_{\text{HH}} = 7.5$  Hz, 2H), 7.27-7.22 (m, 1H), 6.87 (d,  $^3J_{\text{HH}} = 19.2$  Hz, 1H), 6.46 (d,  $^3J_{\text{HH}} = 19.2$  Hz, 1H), 1.40-1.23 (m, 8H), 0.88 (t,  $^3J_{\text{HH}} = 7.1$  Hz, 3H), 0.67-0.60 (m, 2H), 0.14 (s, 6H).  $^{13}\text{C}\{^1\text{H}\}$  NMR ( $\text{CDCl}_3$ ):  $\delta$  144.0, 138.6, 128.9, 128.6, 128.0, 126.5, 33.4, 31.8, 24.0, 22.8, 15.9, 14.3,  $-2.9$ . HRMS (EI) calcd for  $\text{C}_{16}\text{H}_{26}\text{Si}$  ( $\text{M}^+$ ) 246.1798, found 246.1802.

#### Procedure for Equation 2.

*n*BuLi (200  $\mu$ L, 0.314 mmol; 1.57 M solution in hexane) was added to a solution of (*E*)-trimethyl(styryl)silane (**3**) (47.6 mg, 0.270 mmol) in THF (0.5 mL) at  $-78$   $^{\circ}$ C. The mixture was warmed to  $-50$   $^{\circ}$ C and stirred for 22 h at  $-50$   $^{\circ}$ C. The reaction was quenched with MeOH (0.5 mL) and the mixture was concentrated under vacuum to give crude trimethyl(1-phenyl-2-hexyl)silane (**4**). The yield was determined to be 65% by  $^1$ H NMR against an internal standard ( $\text{CH}_3\text{NO}_2$ ). For analytical purpose, this was purified by GPC with  $\text{CHCl}_3$ .

$^1$ H NMR ( $\text{CDCl}_3$ ):  $\delta$  7.29-7.22 (m, 2H), 7.19-7.13 (m, 3H), 2.73 (dd,  $^2J_{\text{HH}} = 14.2$  Hz and  $^3J_{\text{HH}} = 5.5$  Hz, 1H), 2.51 (dd,  $^2J_{\text{HH}} = 13.8$  Hz and  $^3J_{\text{HH}} = 9.6$  Hz, 1H), 1.43-1.13 (m, 6H), 1.01-0.92 (m, 1H), 0.82 (t,  $^3J_{\text{HH}} = 7.1$  Hz, 3H),  $-0.03$  (s, 9H).  $^{13}\text{C}\{^1\text{H}\}$  NMR ( $\text{CDCl}_3$ ):  $\delta$  143.3, 129.0, 128.2, 125.6, 36.2, 31.2, 29.3, 28.0, 23.2, 14.1,  $-2.0$ . HRMS (EI) calcd for  $\text{C}_{15}\text{H}_{26}\text{Si}$  ( $\text{M}^+$ ) 234.1798, found 234.1802.

#### General Procedure for Table 1 and Equation 3.

*sec*BuLi (40.7  $\mu$ L, 50.0  $\mu$ mol; 1.23 M solution in cyclohexane/hexane) was added to a solution of monomer **1** or **6** (0.500 mmol) in toluene (0.25 mL) and the mixture was stirred for 22 h at 30  $^{\circ}$ C. The reaction was quenched with MeOH (0.5 mL) and this was dissolved in  $\text{CH}_2\text{Cl}_2$  (2.0 mL). The resulting solution was added dropwise into stirring MeOH (50 mL) with the aid of  $\text{CH}_2\text{Cl}_2$  (2.0 mL), and the precipitates that formed were collected by filtration with MeOH. The solid thus obtained was dried under vacuum to afford **poly-1** or **poly-6**.

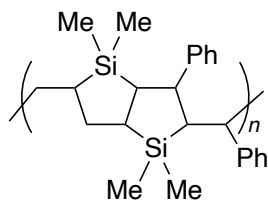

**Table 1, entry 3 (poly-1a).** 5 mol% of *sec*BuLi was used. White solid. 79% yield (74.1 mg).  $T_d = 323\text{ }^\circ\text{C}$ ,  $T_g = 173\text{ }^\circ\text{C}$ .

$^1\text{H}$  NMR (400 MHz in  $\text{CDCl}_3$ )

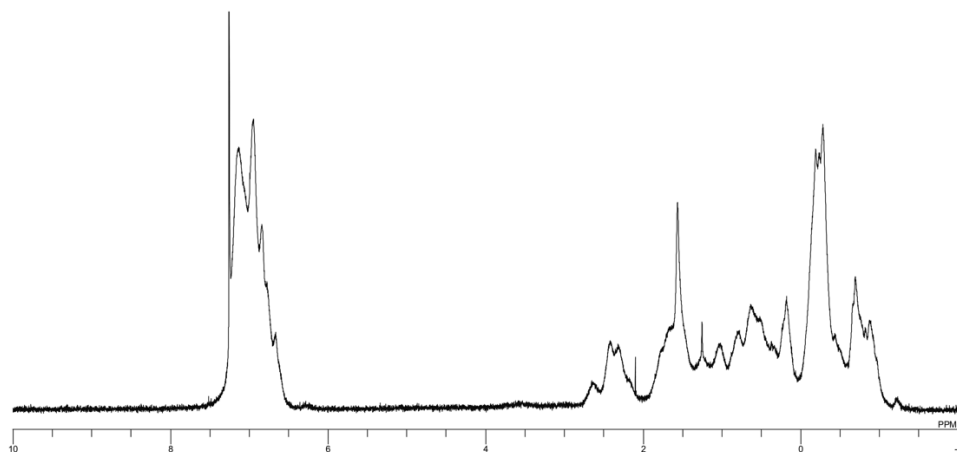

$^{13}\text{C}\{^1\text{H}\}$  NMR (101 MHz in  $\text{CDCl}_3$ )

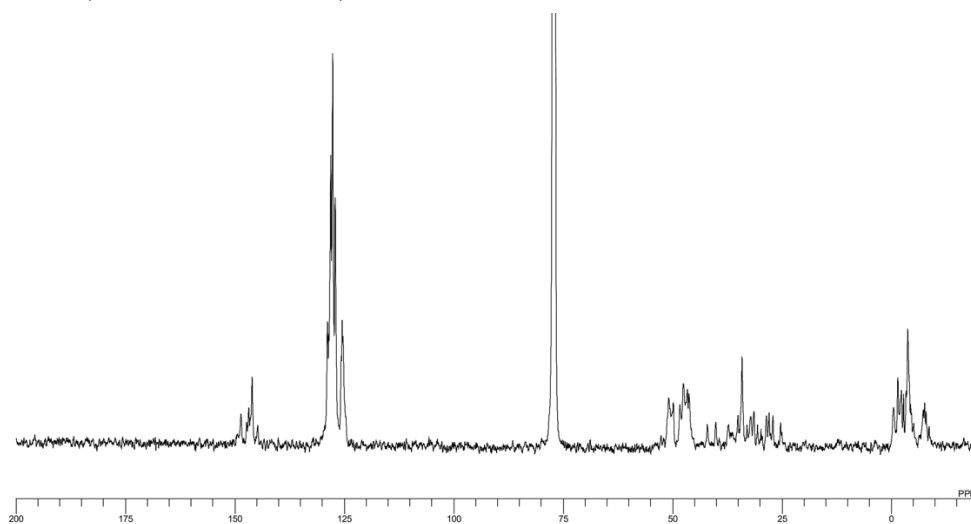



$^{29}\text{Si}\{^1\text{H}\}$  NMR (79 MHz in  $\text{CDCl}_3$ )

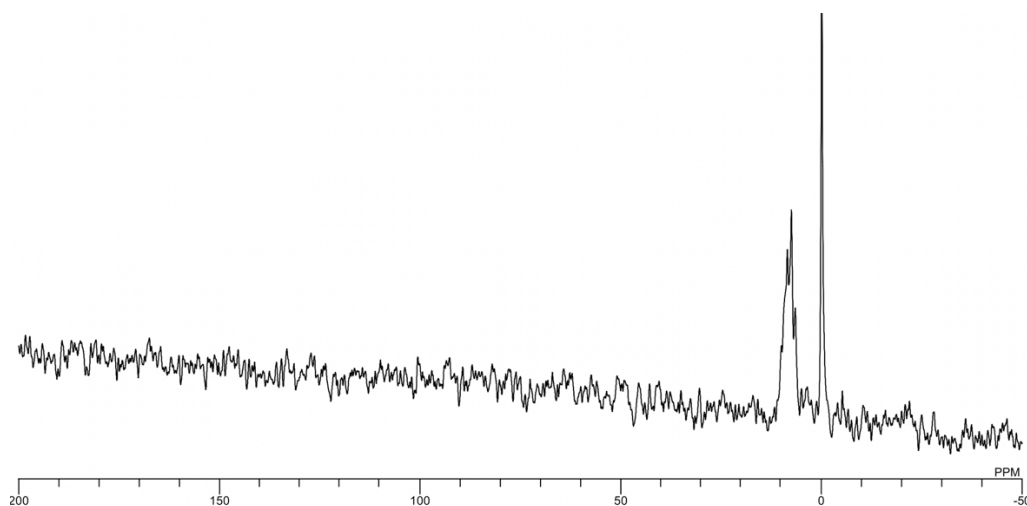

GPC (THF; 1.0 mL/min flow)

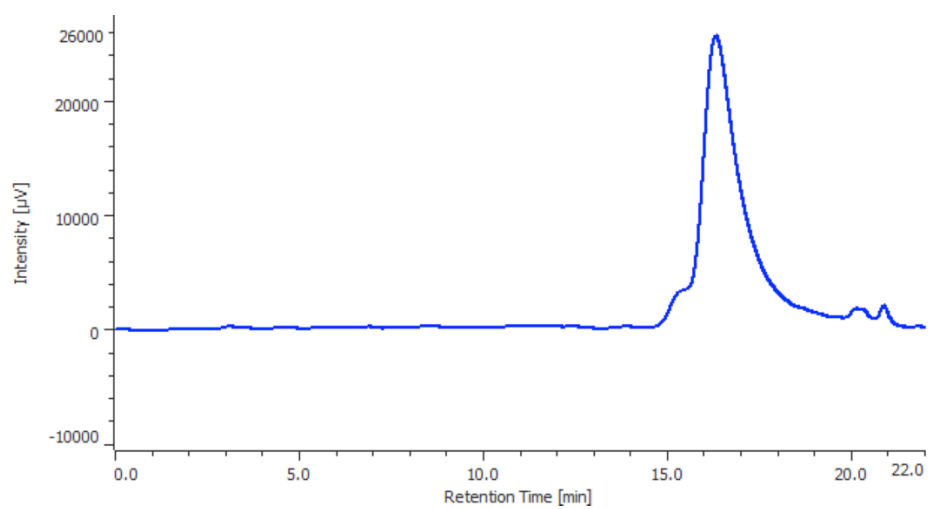

TG (+10  $^\circ\text{C}/\text{min}$  from 50  $^\circ\text{C}$  to 500  $^\circ\text{C}$ )

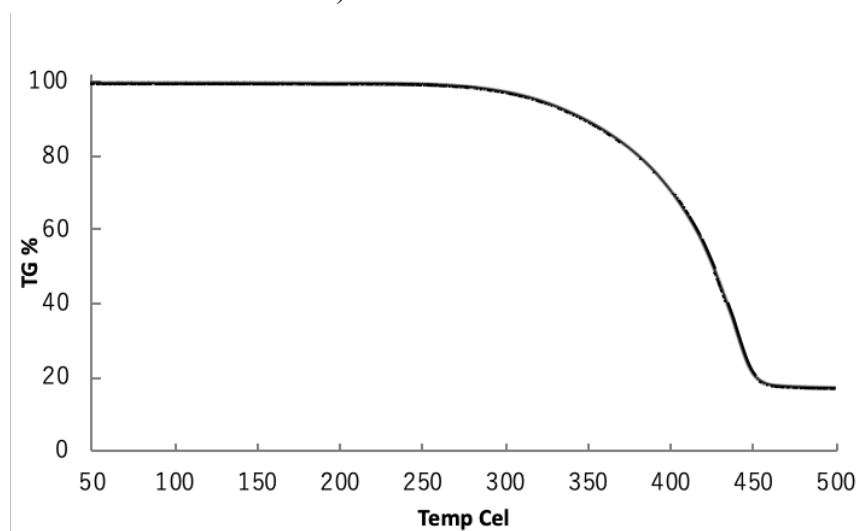

DSC (+10 °C/min from 20 °C to 250 °C, second heating)

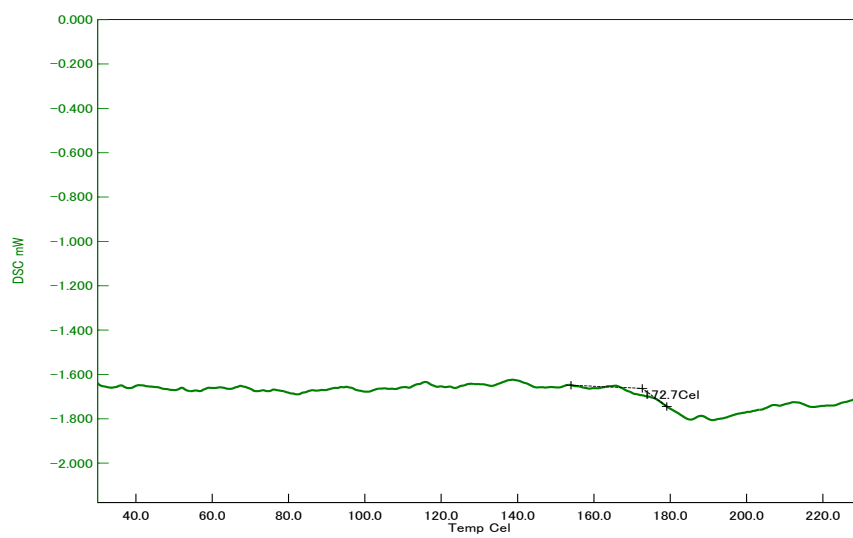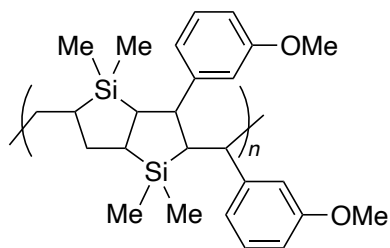

**Table 1, Entry 4 (poly-1b).** White solid. 67% yield (73.3 mg).  $T_d = 341$  °C,  $T_g = 96$  °C.

$^1\text{H}$  NMR (498 MHz in  $\text{CDCl}_3$ )

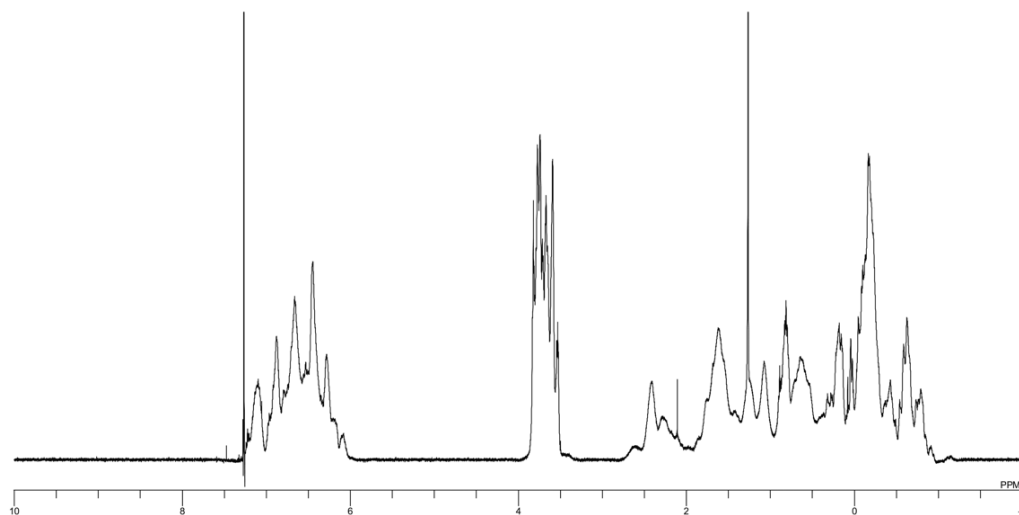

$^{13}\text{C}\{^1\text{H}\}$  NMR (101 MHz in  $\text{CDCl}_3$ )

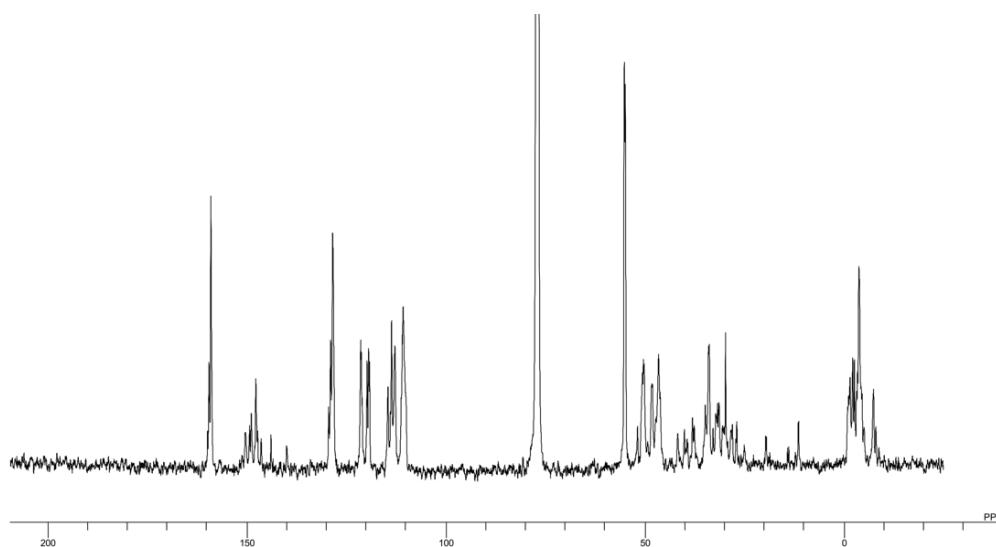

$^{29}\text{Si}\{^1\text{H}\}$  NMR (79 MHz in  $\text{CDCl}_3$ )

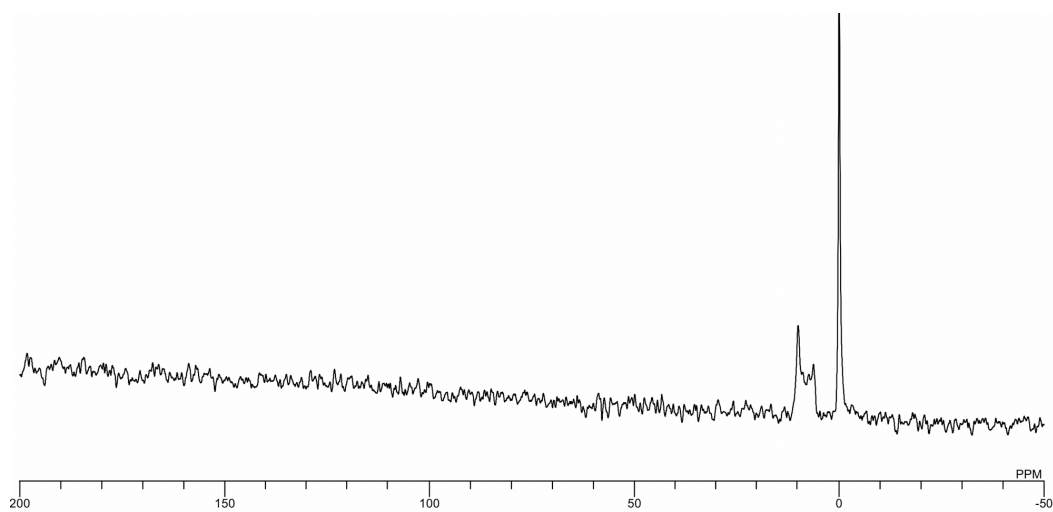

GPC (THF; 1.0 mL/min flow)

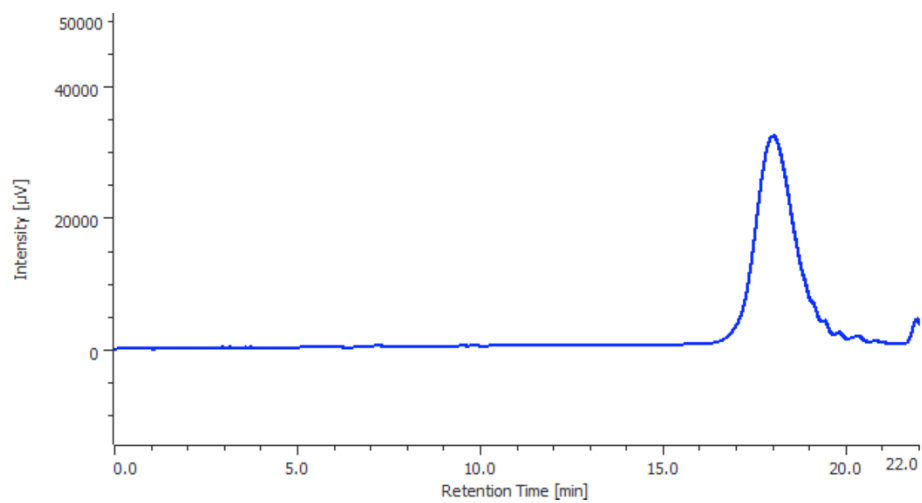

TG (+10 °C/min from 50 °C to 500 °C)

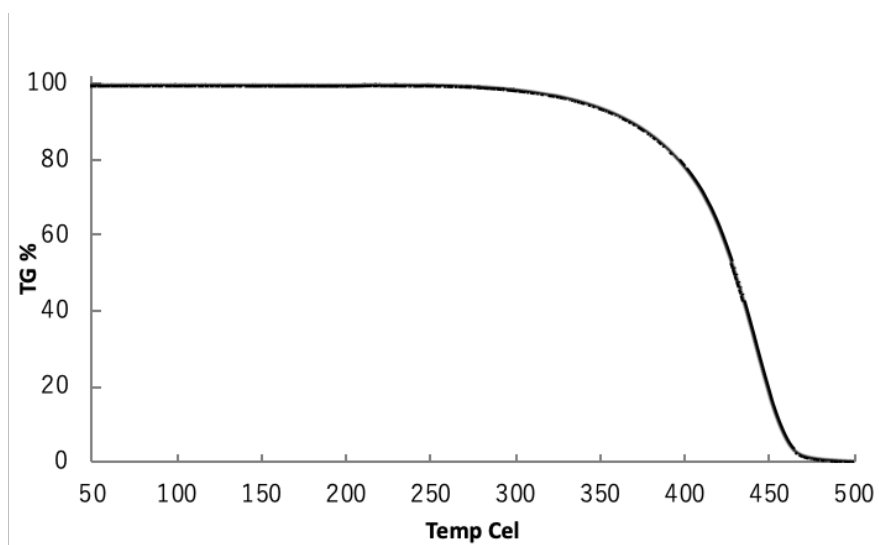

DSC (+10 °C/min from 20 °C to 250 °C, second heating)

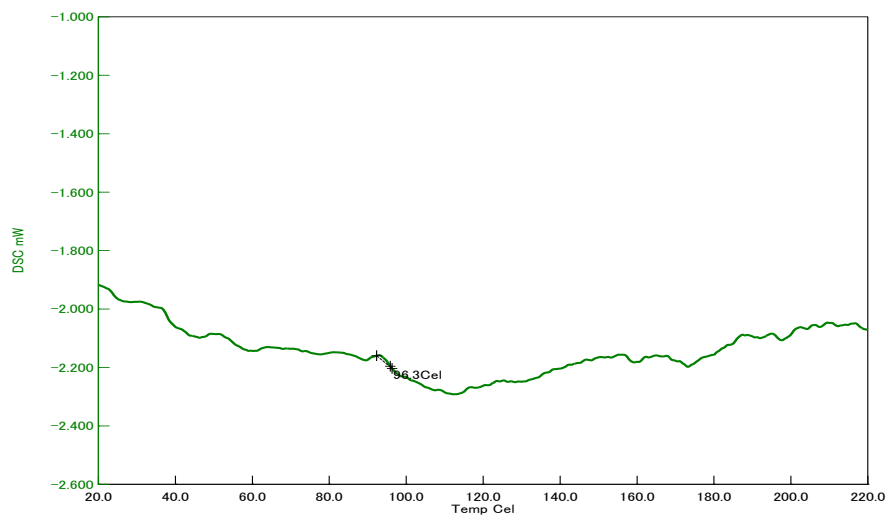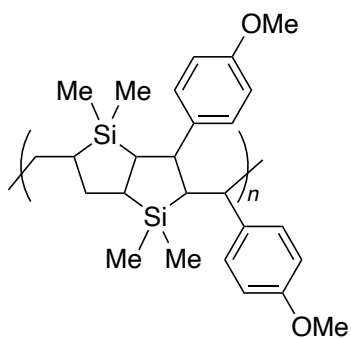

**Table 1, Entry 5 (poly-1c).** White solid. 69% yield (65.0 mg).  $T_d = 378$  °C,  $T_g = 112$  °C.

$^1\text{H}$  NMR (400 MHz in  $\text{CDCl}_3$ )

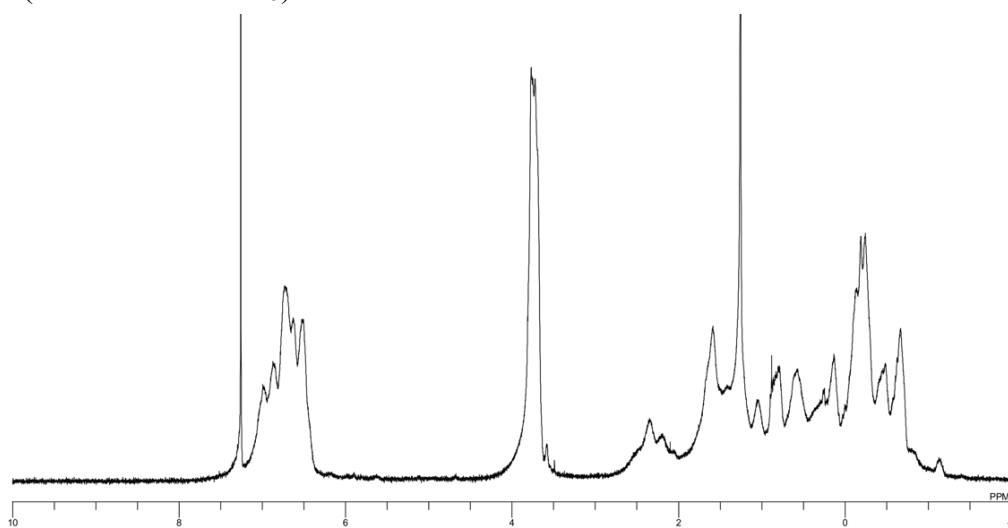

$^{13}\text{C}\{^1\text{H}\}$  NMR (101 MHz in  $\text{CDCl}_3$ )

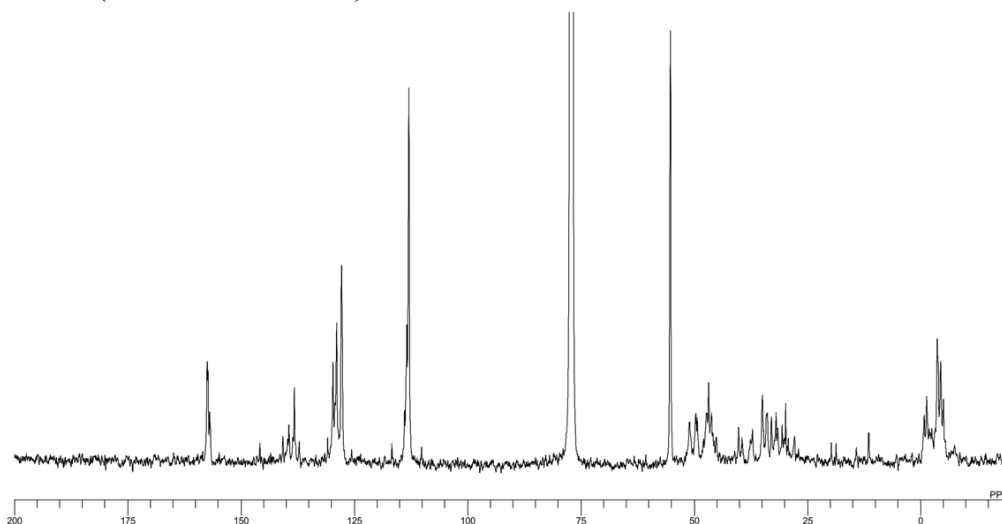

$^{29}\text{Si}\{^1\text{H}\}$  NMR (79 MHz in  $\text{CDCl}_3$ )

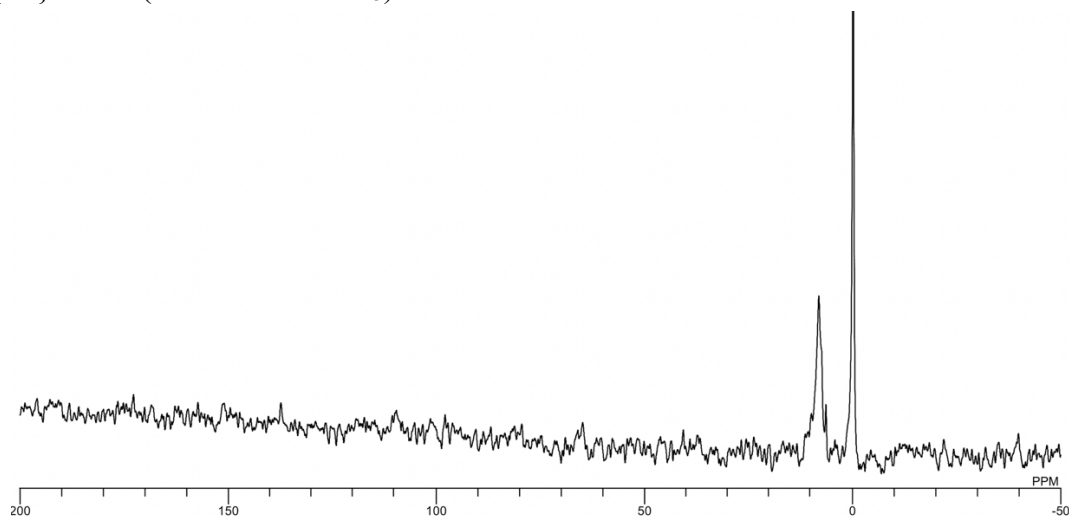

GPC (THF; 1.0 mL/min flow)

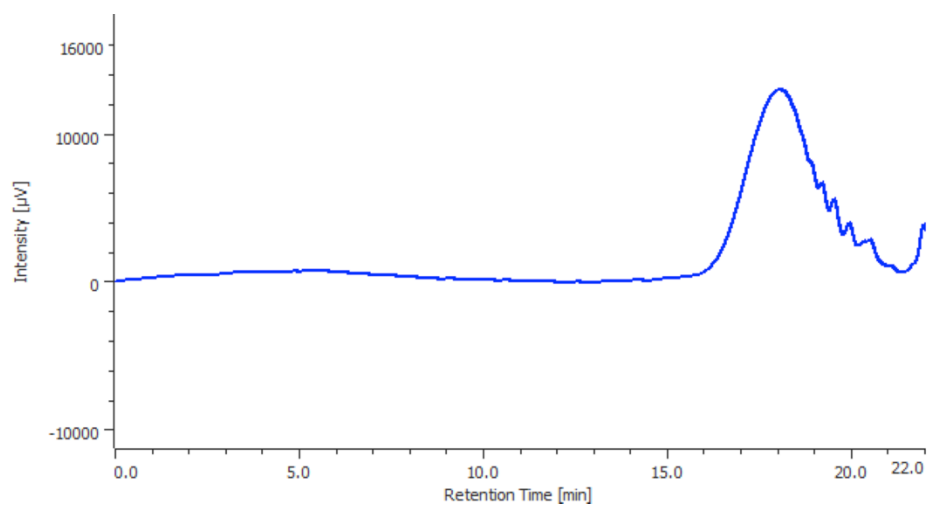

TG (+10 °C/min from 50 °C to 500 °C)

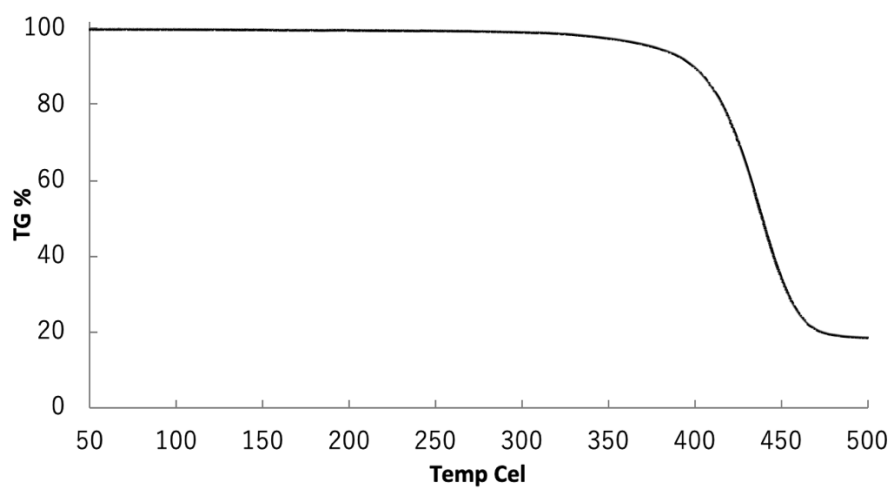

DSC (+10 °C/min from 20 °C to 250 °C, second heating)

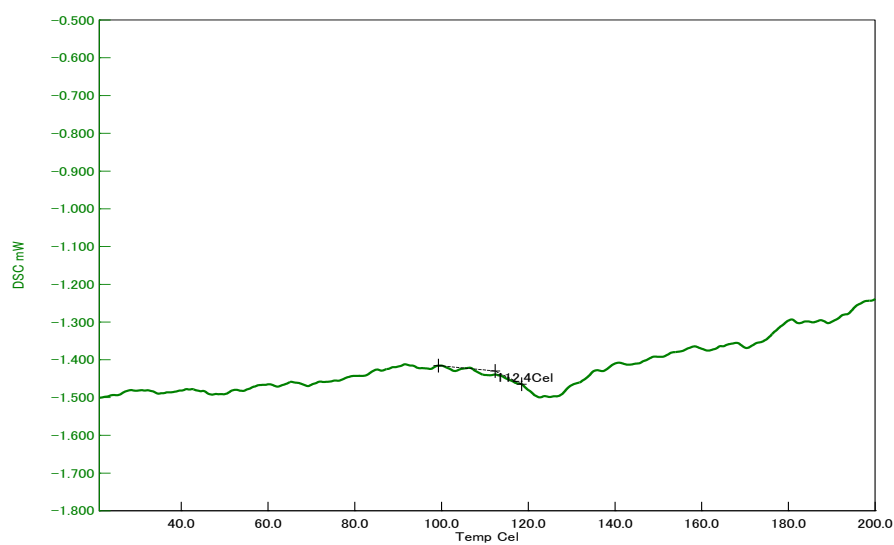

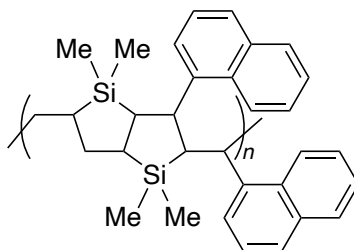

**Table 1, Entry 6 (poly-1d).** White solid. 89% yield (106 mg).  $T_d = 361\text{ }^\circ\text{C}$ ,  $T_g = 187\text{ }^\circ\text{C}$ .  
 $^1\text{H}$  NMR (400 MHz in  $\text{CDCl}_3$ )

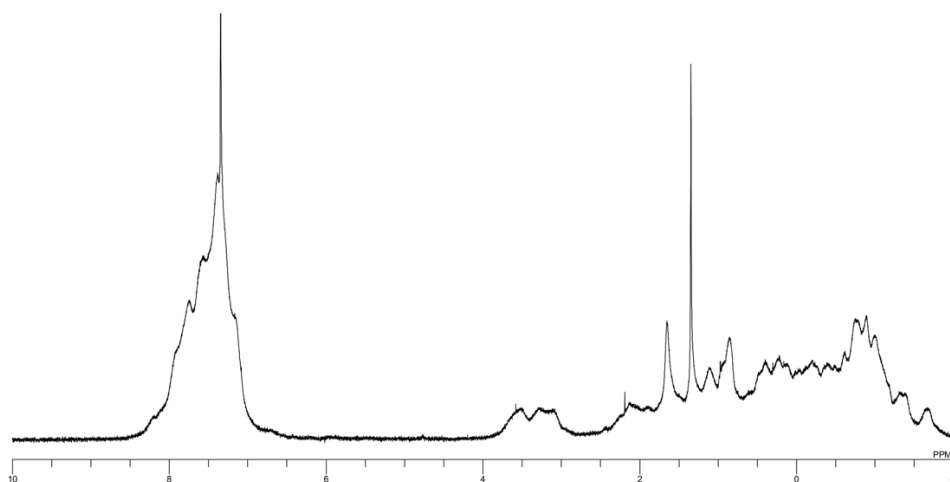

$^{13}\text{C}\{^1\text{H}\}$  NMR (101 MHz in  $\text{CDCl}_3$ )

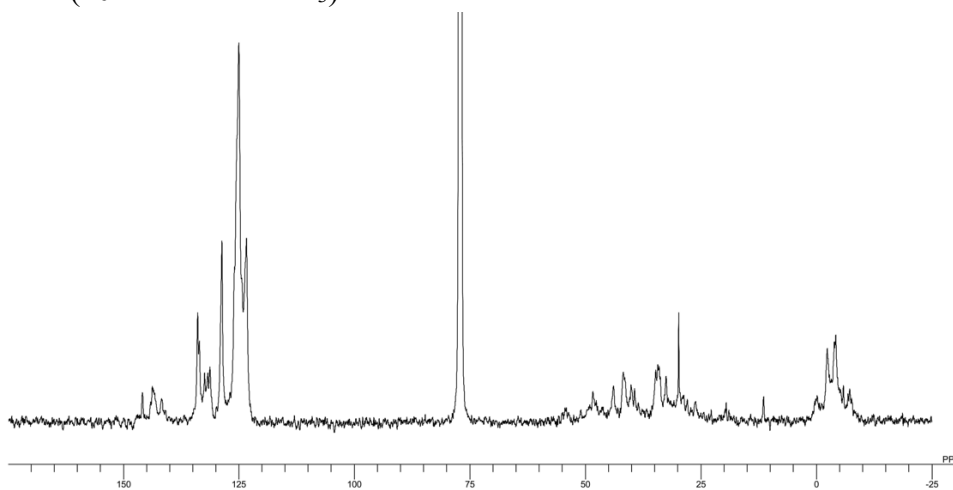

$^{29}\text{Si}\{^1\text{H}\}$  NMR (79 MHz in  $\text{CDCl}_3$ )

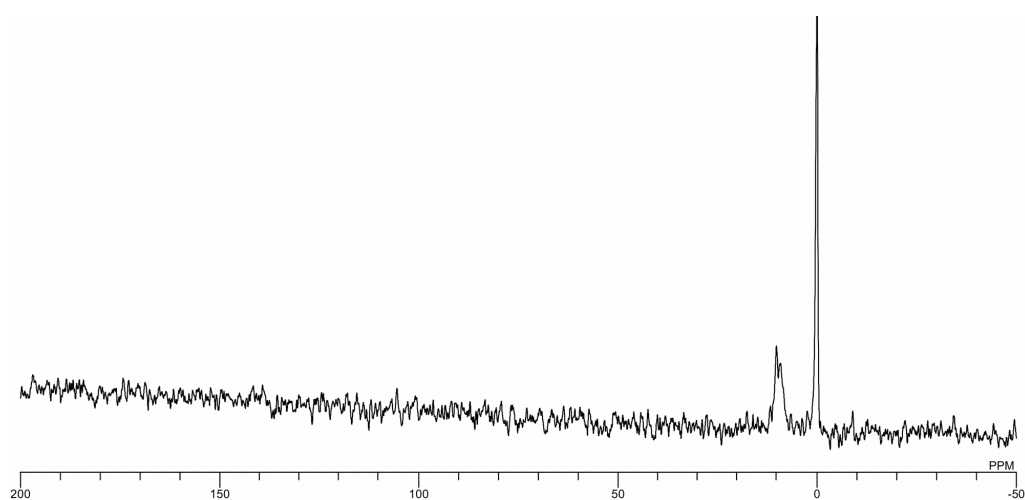

GPC (THF; 1.0 mL/min flow)

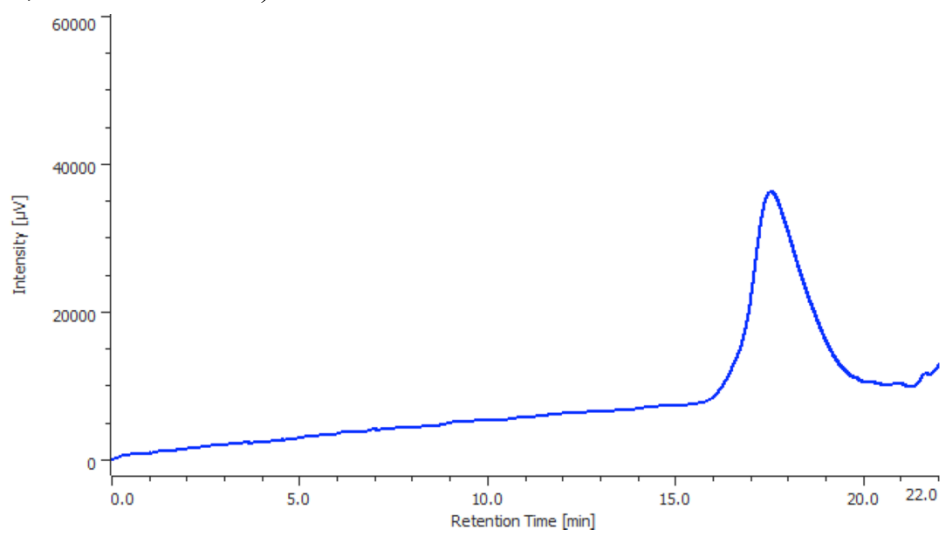

TG (+10  $^\circ\text{C}/\text{min}$  from 50  $^\circ\text{C}$  to 500  $^\circ\text{C}$ )

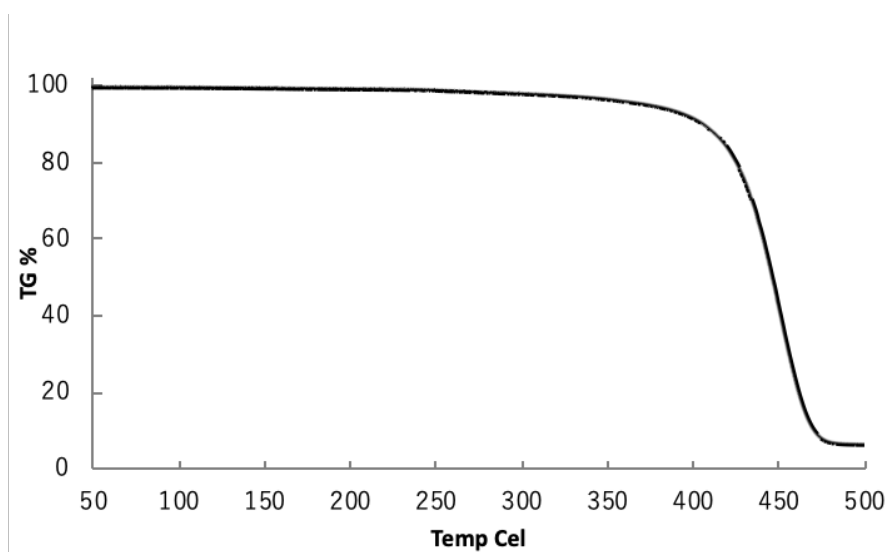



DSC (+10 °C/min from 20 °C to 250 °C, second heating)

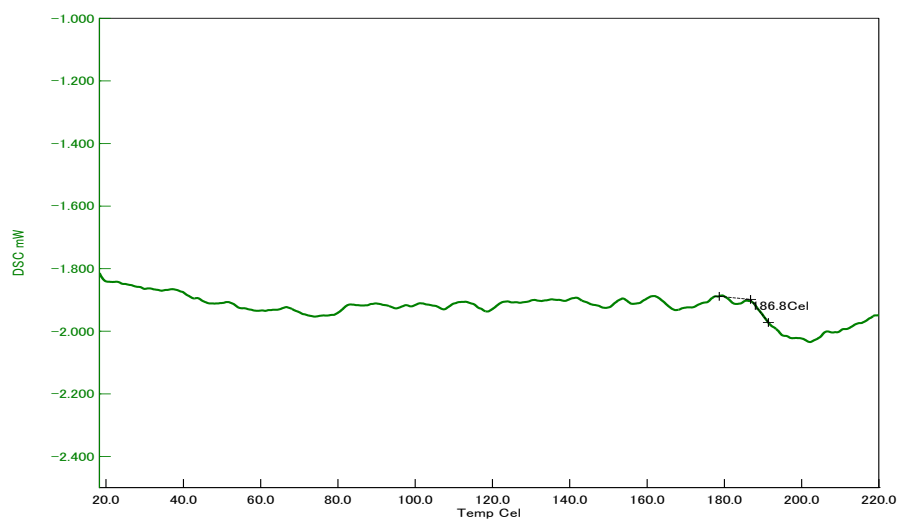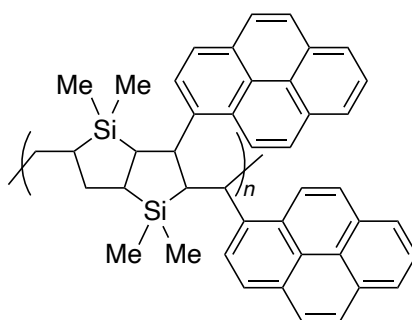

**Table 1, Entry 7 (poly-1e).** Yellow solid. 89% yield (139 mg).  $T_d = 396\text{ °C}$ ,  $T_g$ : not observed.  
 $^1\text{H NMR}$  (498 MHz in  $\text{CDCl}_3$ )

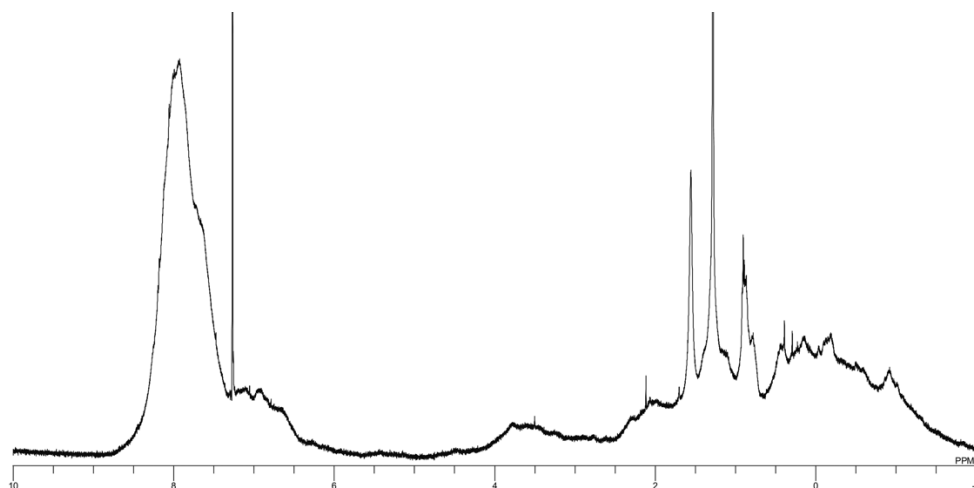

$^{13}\text{C}\{^1\text{H}\}$  NMR (101 MHz in  $\text{CDCl}_3$ )

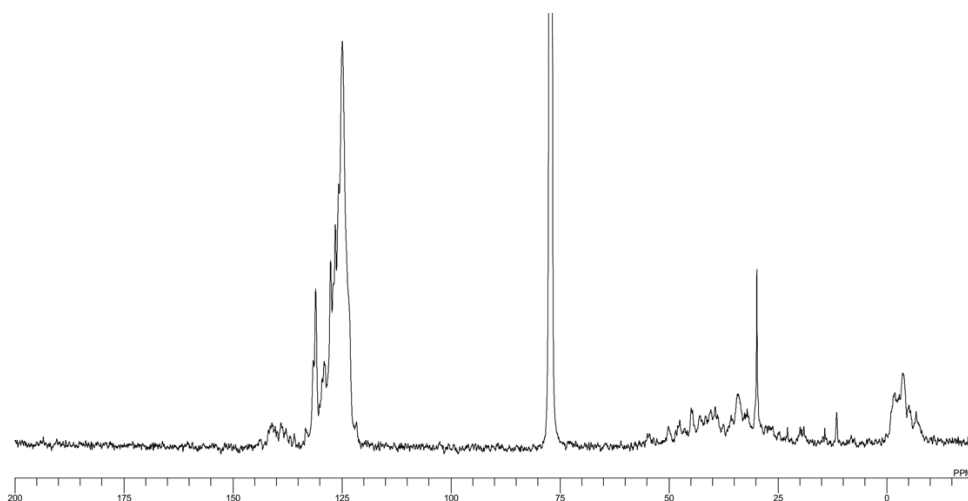

$^{29}\text{Si}\{^1\text{H}\}$  NMR (79 MHz in  $\text{CDCl}_3$ )

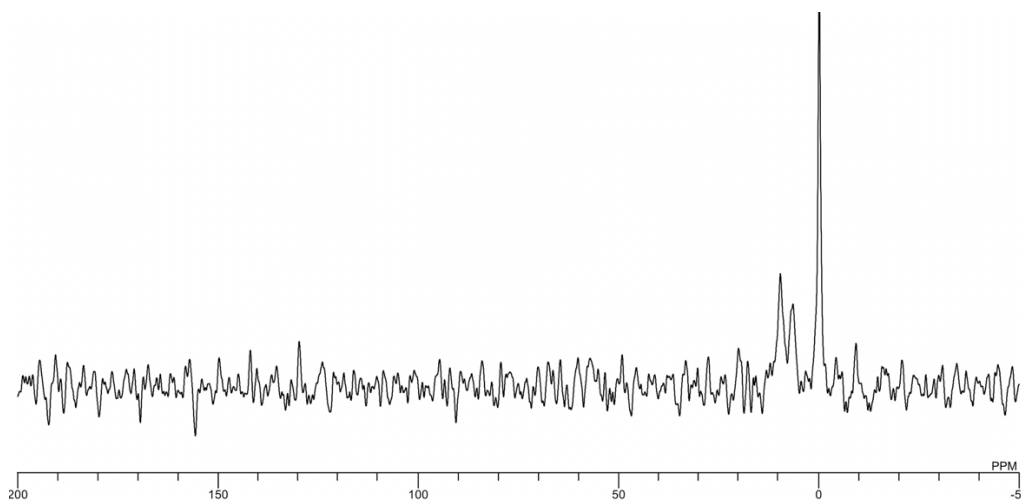

GPC (THF; 1.0 mL/min flow)

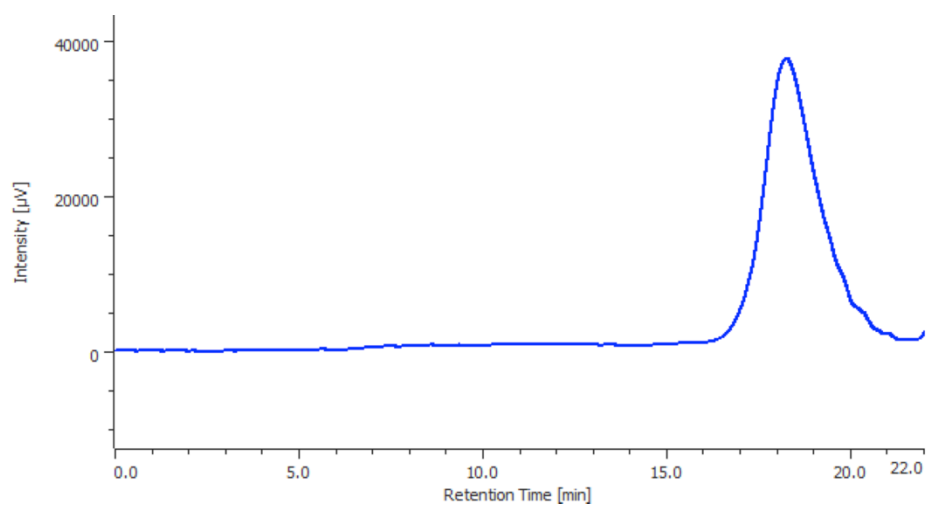

TG (+10 °C/min from 50 °C to 500 °C)

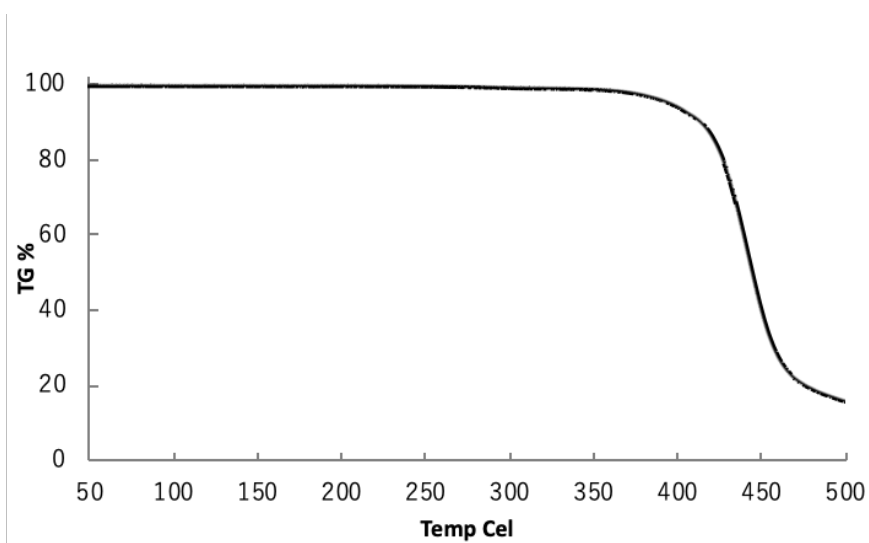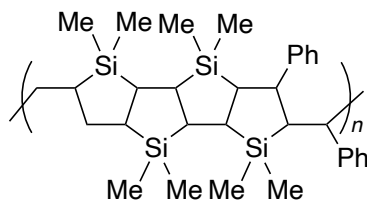

**Equation 3 (poly-6).** White solid. 89% yield (121 mg).  $T_d = 374\text{ }^\circ\text{C}$ ,  $T_g = 158\text{ }^\circ\text{C}$ .

$^1\text{H NMR}$  (400 MHz in  $\text{CDCl}_3$ )

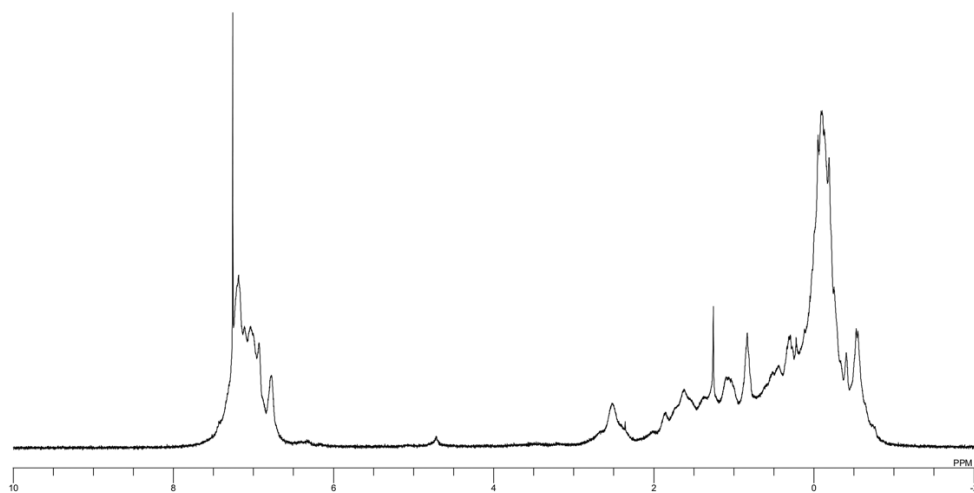

$^{13}\text{C}\{^1\text{H}\}$  NMR (101 MHz in  $\text{CDCl}_3$ )

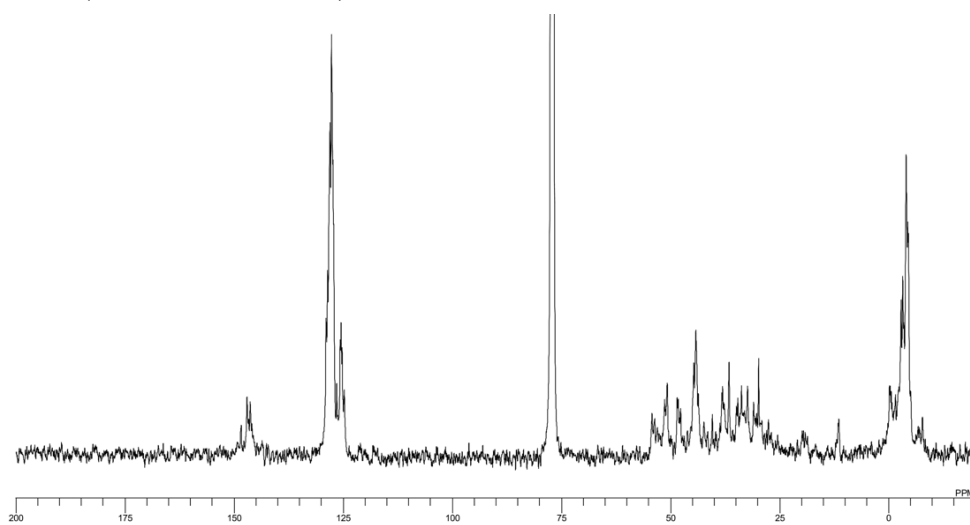

$^{29}\text{Si}\{^1\text{H}\}$  NMR (79 MHz in  $\text{CDCl}_3$ )

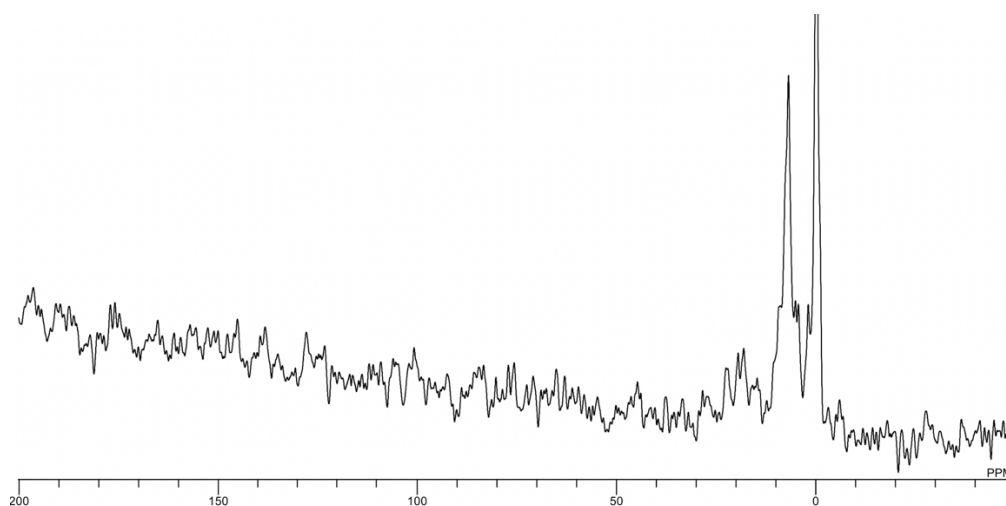

GPC (THF; 1.0 mL/min flow)

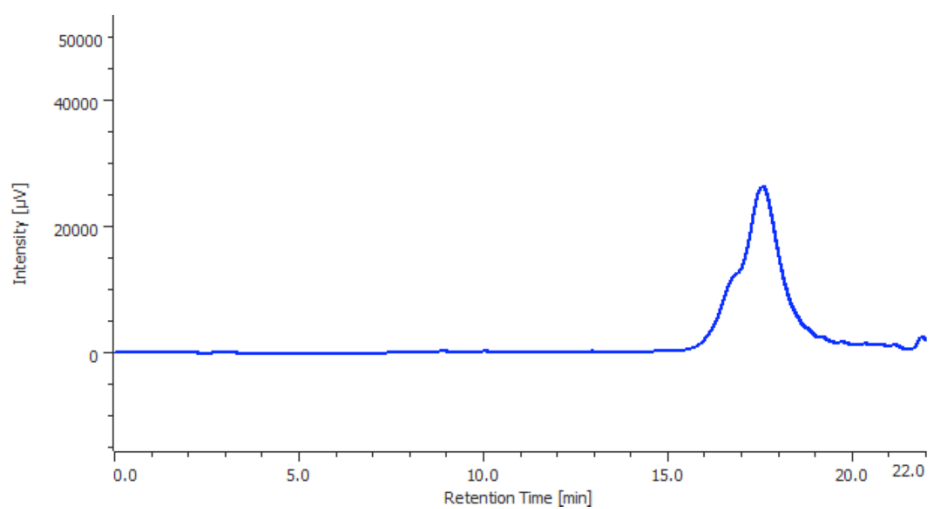

TG (+10 °C/min from 50 °C to 500 °C)

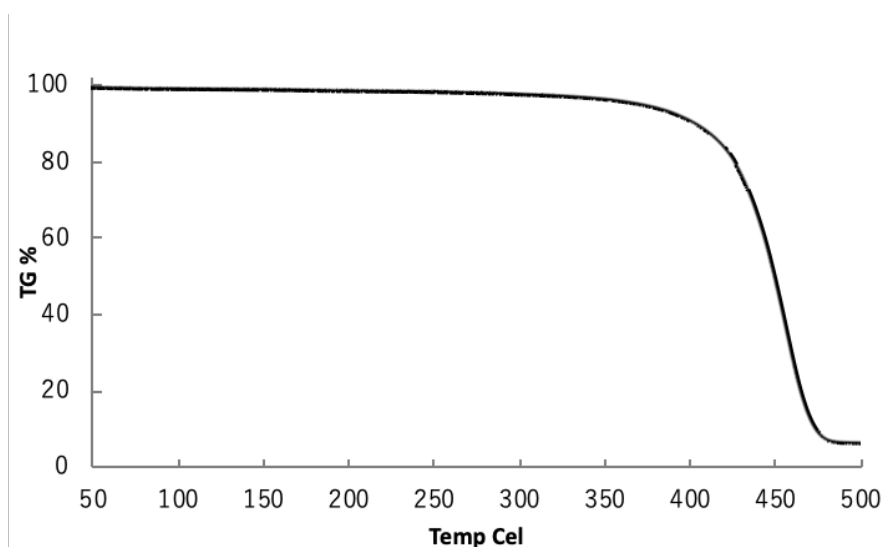

DSC (+10 °C/min from 20 °C to 250 °C, second heating)

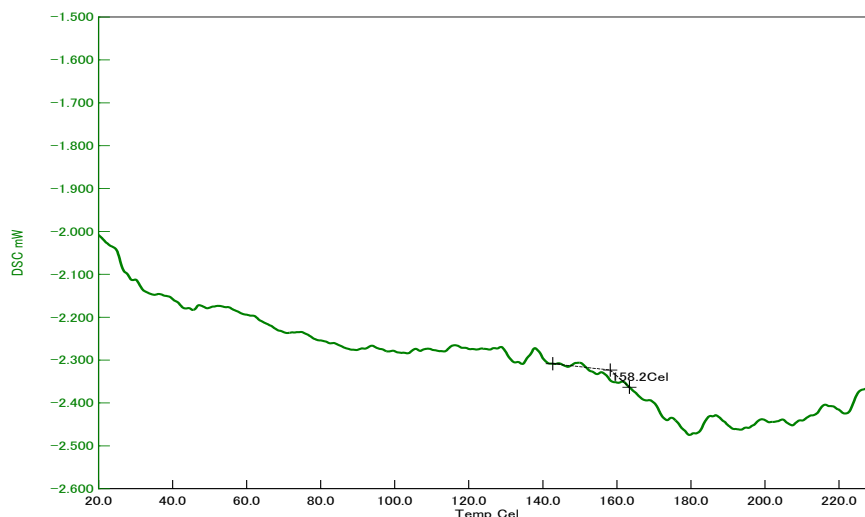

### Procedure for Equations 4 and 5.

*sec*BuLi (40.7  $\mu$ L, 50.0  $\mu$ mol; 1.23 M solution in cyclohexane/hexane) was added to a solution of monomer **1a** (94.2 mg, 0.500 mmol) in toluene (0.5 mL). The mixture was stirred for 6 h at 30 °C, and an aliquot (5.0  $\mu$ L) was taken for molecular weight analysis. Styrene or trimethyl(vinyl)silane (1.00 mmol) was then added to the reaction mixture and this was stirred for 22 h at 30 °C. The reaction was quenched with MeOH (0.5 mL) and this was dissolved in CH<sub>2</sub>Cl<sub>2</sub> (2.0 mL). The resulting solution was added dropwise into stirring MeOH (50 mL) with the aid of CH<sub>2</sub>Cl<sub>2</sub> (2.0 mL), and the precipitates that formed were collected by filtration with MeOH. The solid thus obtained was dried under vacuum to afford **poly-1a-b-PS** or **poly-1a-b-PTMVS**.

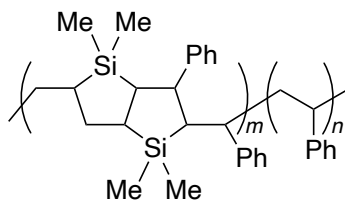

**Equation 4 (poly-1a-b-PS).** White solid. 96% yield (190 mg).  $T_d = 358\text{ }^\circ\text{C}$ ,  $T_g = 84\text{ }^\circ\text{C}$ .

$^1\text{H}$  NMR (400 MHz in  $\text{CDCl}_3$ )

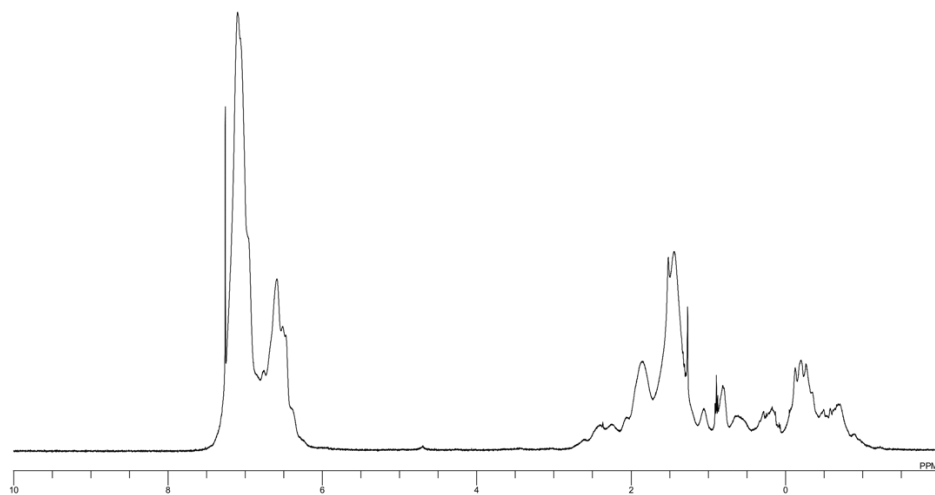

$^{13}\text{C}\{^1\text{H}\}$  NMR (101 MHz in  $\text{CDCl}_3$ )

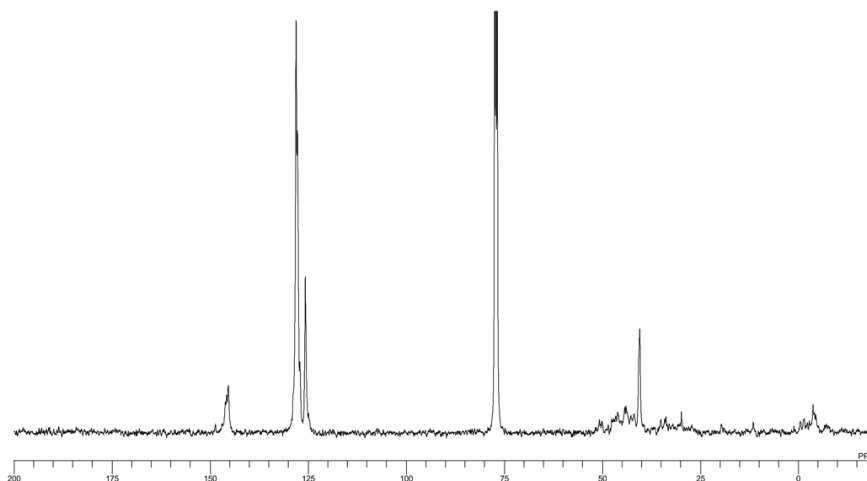

GPC (THF; 1.0 mL/min flow; pink: after stitching polymerization, blue: after block copolymerization)

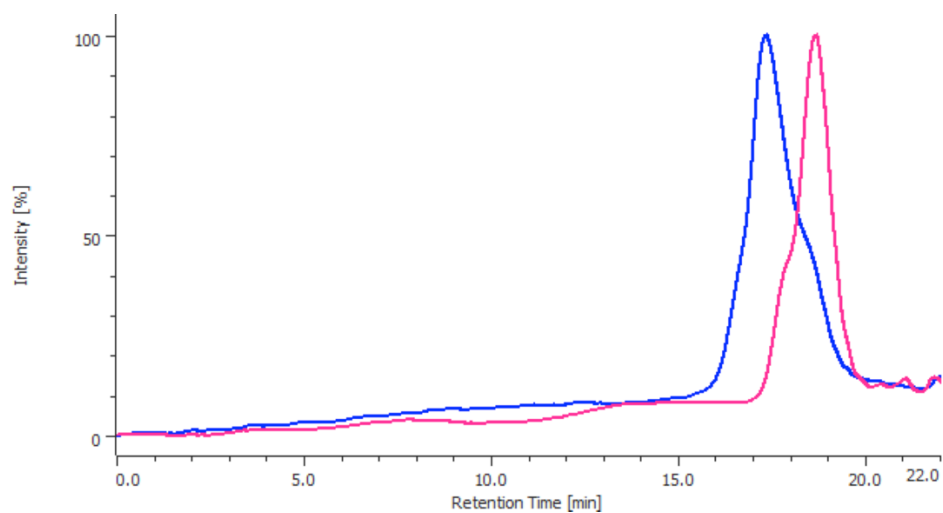

TG (+10 °C/min from 50 °C to 500 °C)

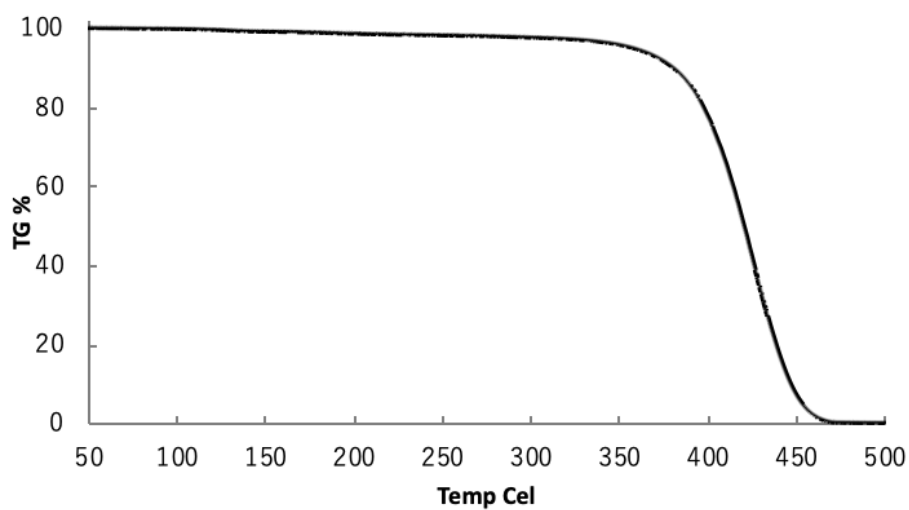

DSC (+10 °C/min from 20 °C to 250 °C, second heating)

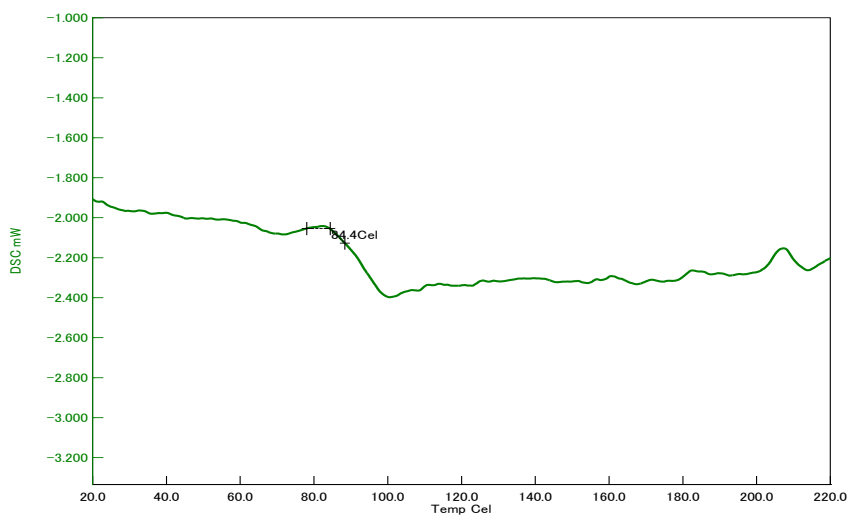

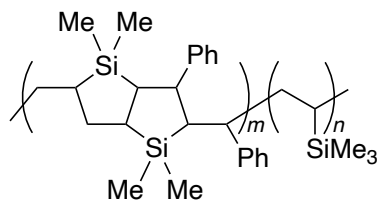

**Equation 5 (poly-1a-b-PTMVS).** White solid. 81% yield (157 mg).  $T_d = 296\text{ }^\circ\text{C}$ ,  $T_g = 142\text{ }^\circ\text{C}$ .

$^1\text{H}$  NMR (498 MHz in  $\text{CDCl}_3$ )

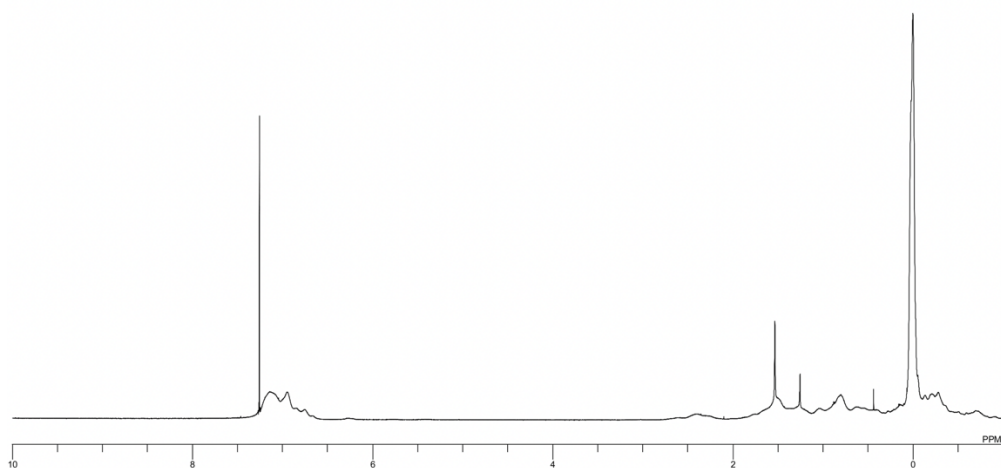

$^{13}\text{C}\{^1\text{H}\}$  NMR (101 MHz in  $\text{CDCl}_3$ )

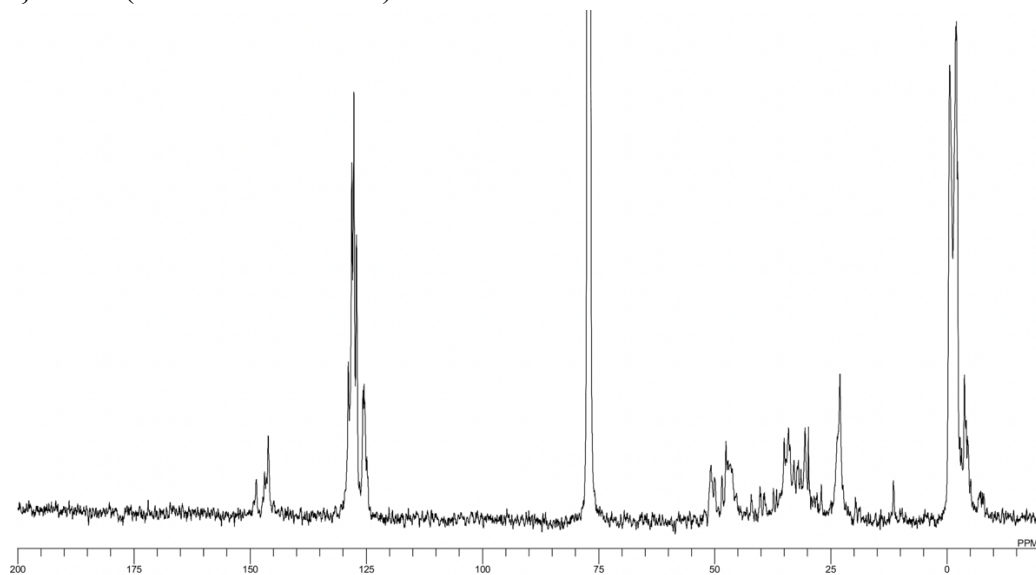



GPC (THF; 1.0 mL/min flow; pink: after stitching polymerization, blue: after block copolymerization)

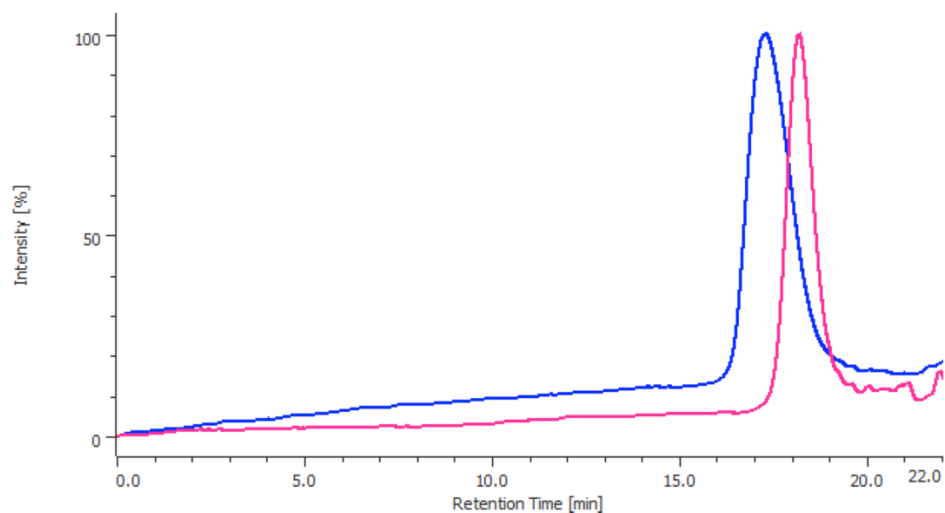

TG (+10 °C/min from 50 °C to 500 °C)

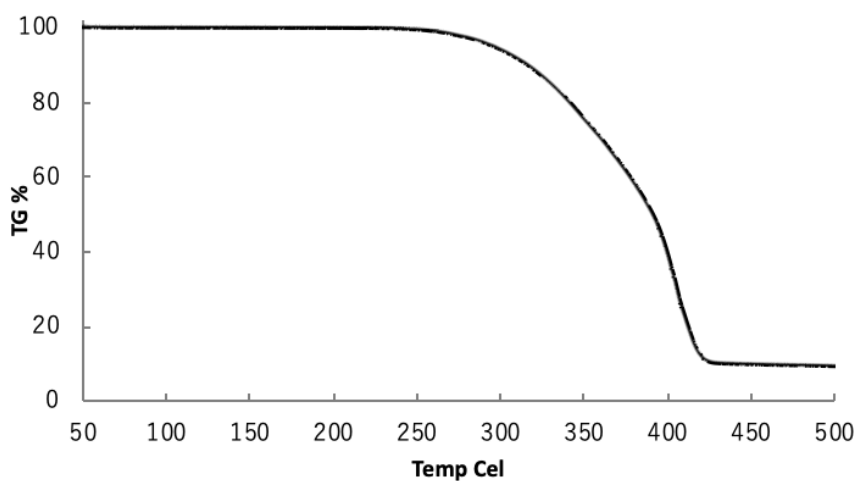

DSC (+10 °C/min from 20 °C to 250 °C, second heating)

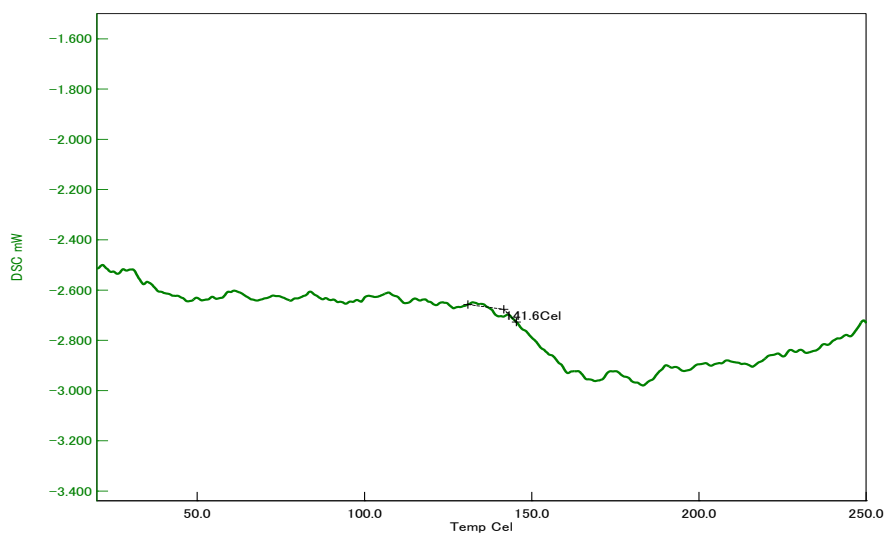

## Procedure for the Polymerization of Dimethyldivinylsilane.

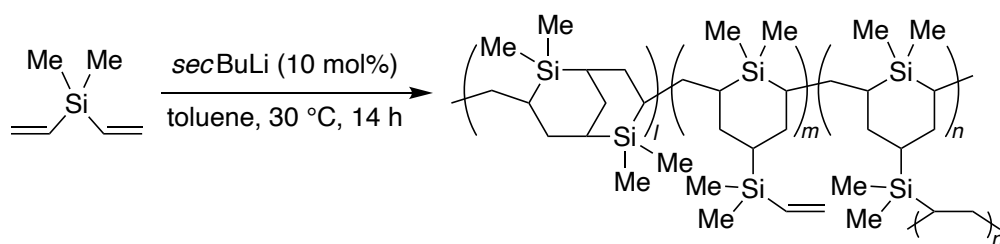

To compare the present stitching polymerization of styryl(vinyl)silanes **1** with the reported anionic polymerization of divinylsilanes,<sup>2</sup> we conducted a polymerization of dimethyldivinylsilane as follows: *sec*BuLi (81.2  $\mu$ L, 100  $\mu$ mol; 1.23 M solution in cyclohexane/hexane) was added to a solution of dimethyldivinylsilane (112 mg, 1.00 mmol) in toluene (1.0 mL) and the mixture was stirred for 14 h at 30 °C. The reaction was quenched with MeOH (0.5 mL) and this was dissolved in CH<sub>2</sub>Cl<sub>2</sub> (2.0 mL). The resulting solution was added dropwise into stirring MeOH (50 mL) with the aid of CH<sub>2</sub>Cl<sub>2</sub> (2.0 mL), and the precipitates that formed were collected by filtration with MeOH. The solid thus obtained was dried under vacuum to afford polydimethyldivinylsilane as a white solid. 73% yield (81.8 mg).  $M_n = 9300$ ,  $M_w/M_n = 13.2$ . The structure was deduced based on the literature and ca. 15% of vinyl group remained unreacted. Prolonged reaction time resulted in the formation of an insoluble gel, presumably due to the cross-linking between the uncyclized vinyl groups.

<sup>1</sup>H NMR (400 MHz in CDCl<sub>3</sub>)

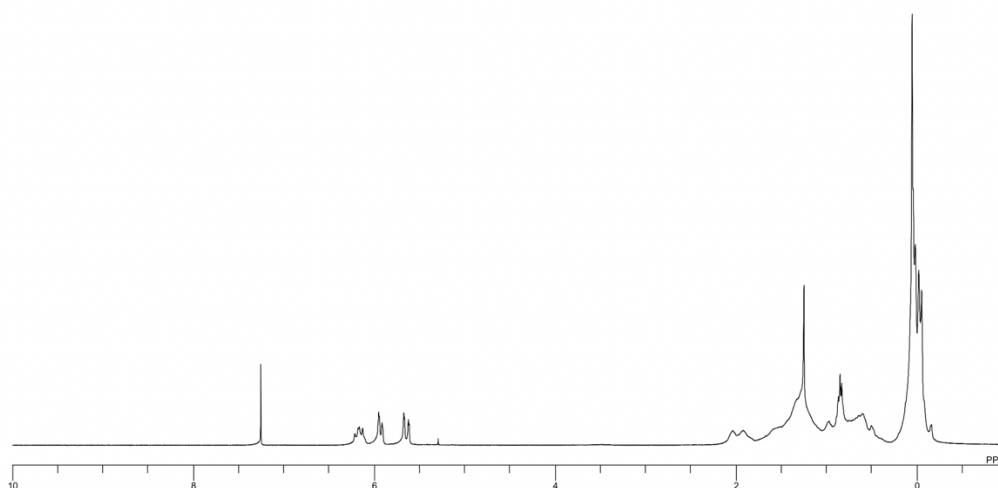

$^{13}\text{C}\{^1\text{H}\}$  NMR (101 MHz in  $\text{CDCl}_3$ )

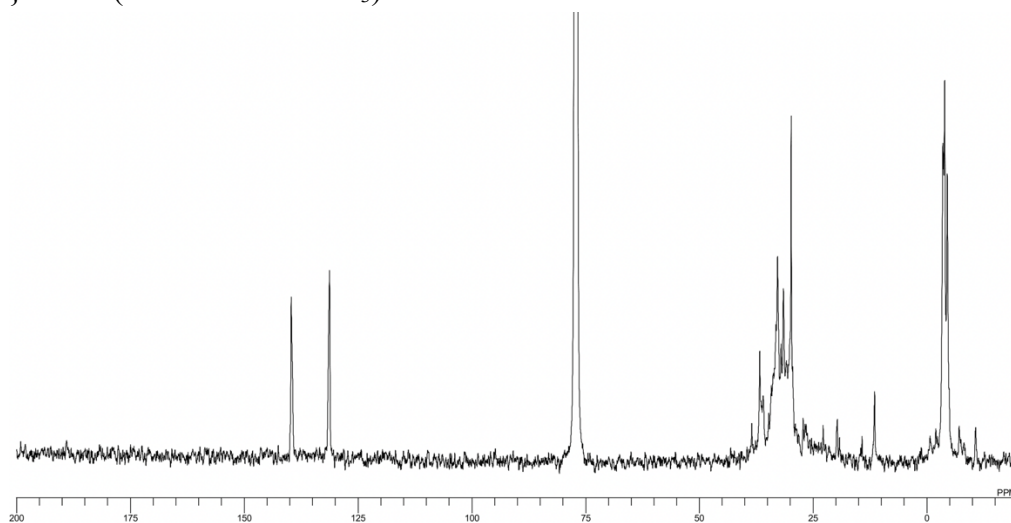

GPC (THF; 1.0 mL/min flow)

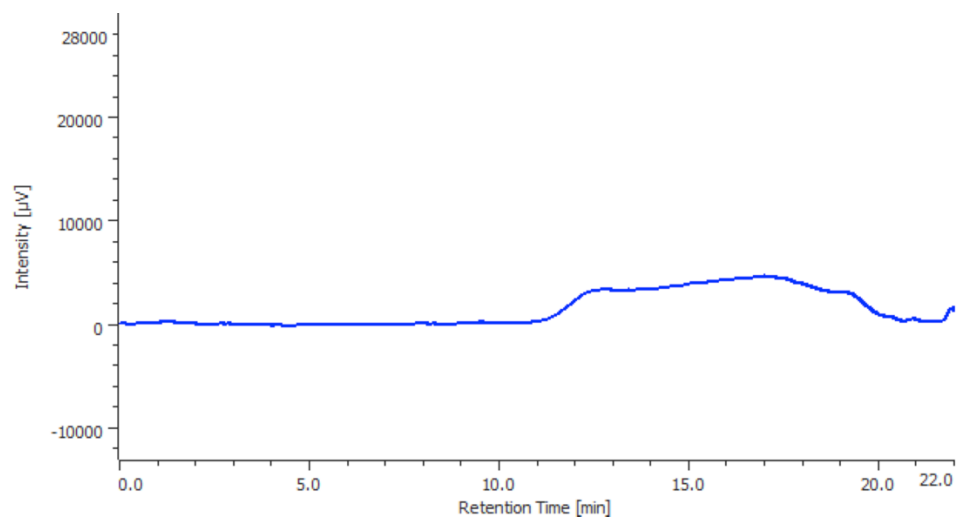

#### IV. UV-vis Absorption and Transmittance Spectra

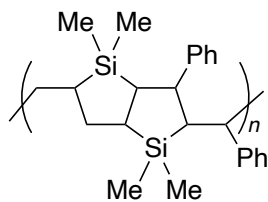

The UV-vis absorption spectrum of **poly-1a** ( $M_n = 3400$ , PDI = 1.17) in THF and the transmittance spectrum of its thin film (thickness: 3  $\mu\text{m}$ ) was measured to examine the transparency of this polymer, and the results are shown in Figures S1 and S2, respectively.

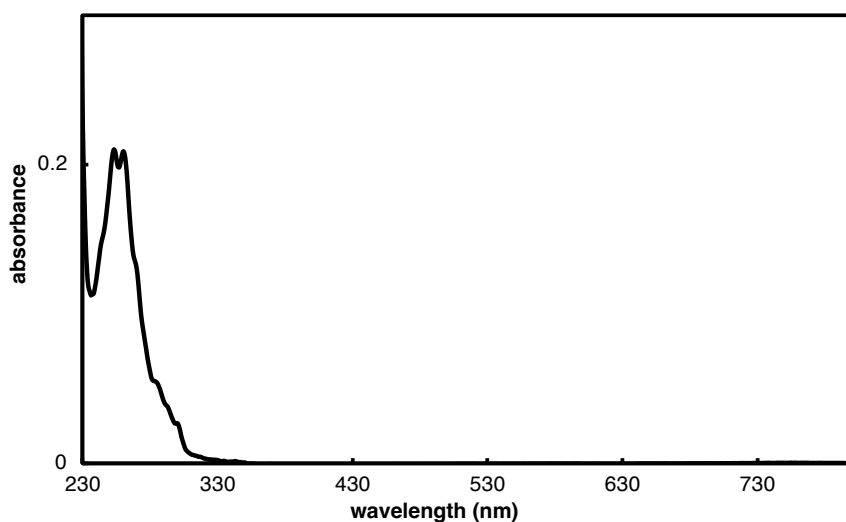

**Figure S1.** UV-vis absorption spectrum of **poly-1a** ( $3.0 \times 10^{-2}$  g/L) in THF at 25 °C.

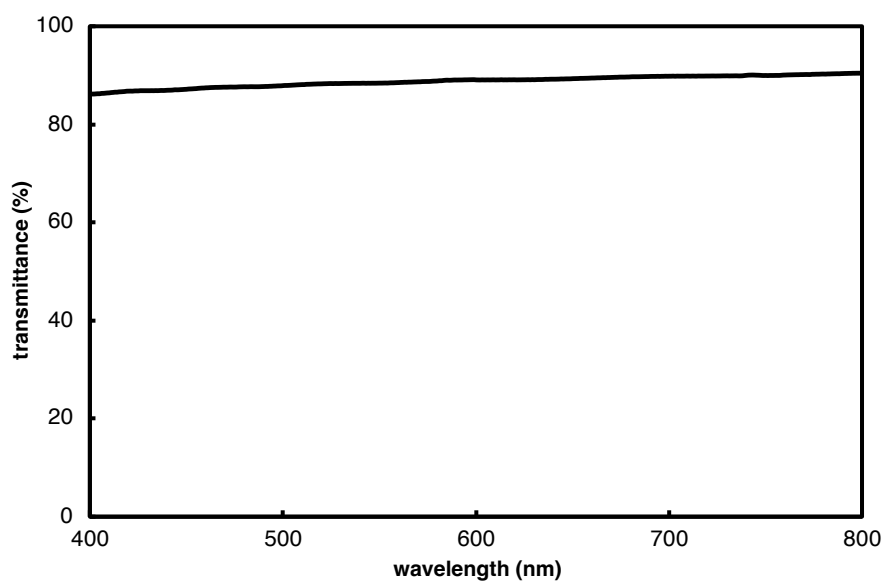

**Figure S2.** Transmittance spectrum of **poly-1a** (3  $\mu\text{m}$  thin film).

# V. $^1\text{H}$ and $^{13}\text{C}$ NMR Spectra

compound **1a**

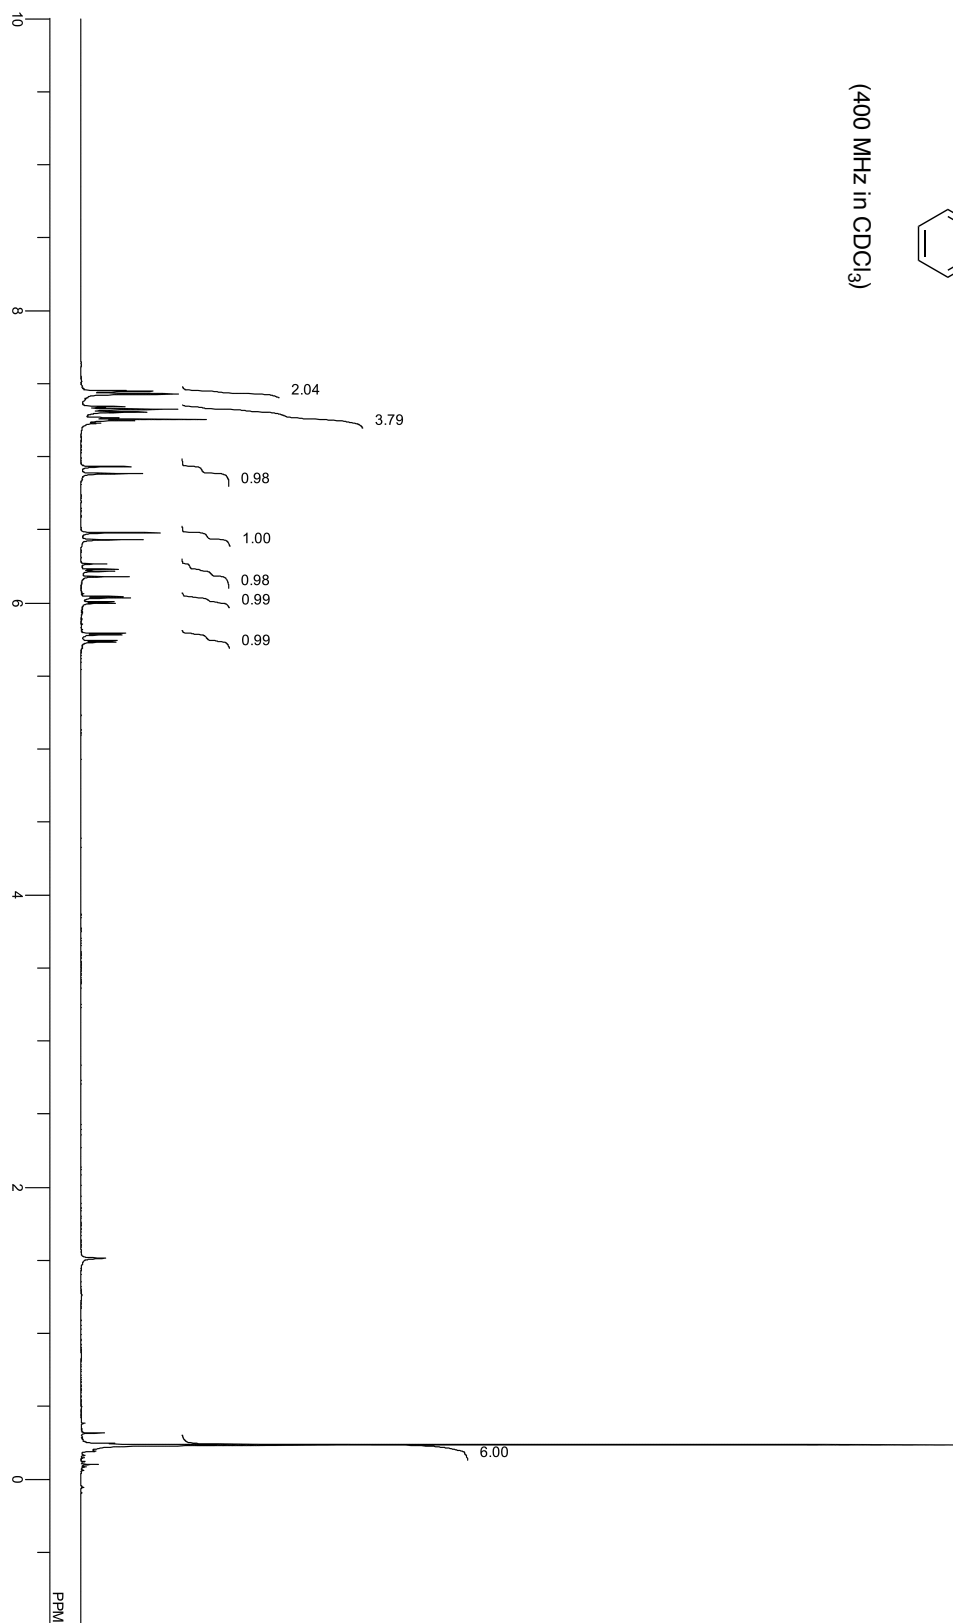

compound 1a

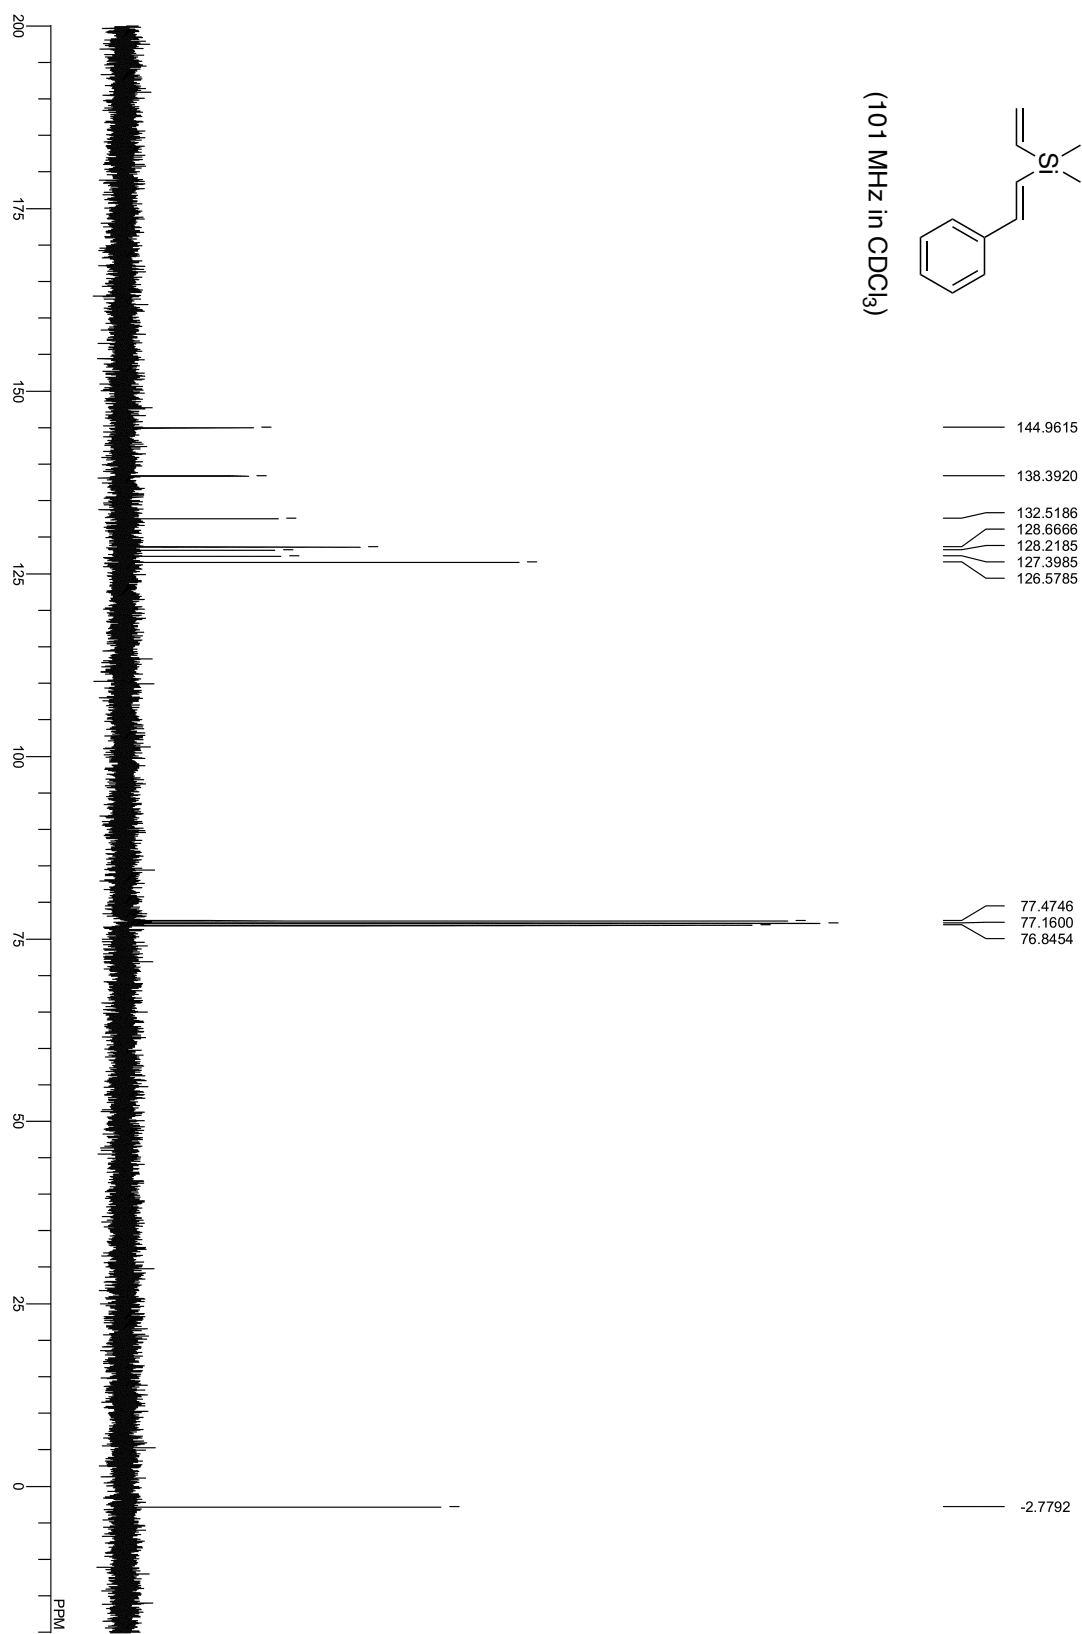

compound **1b**

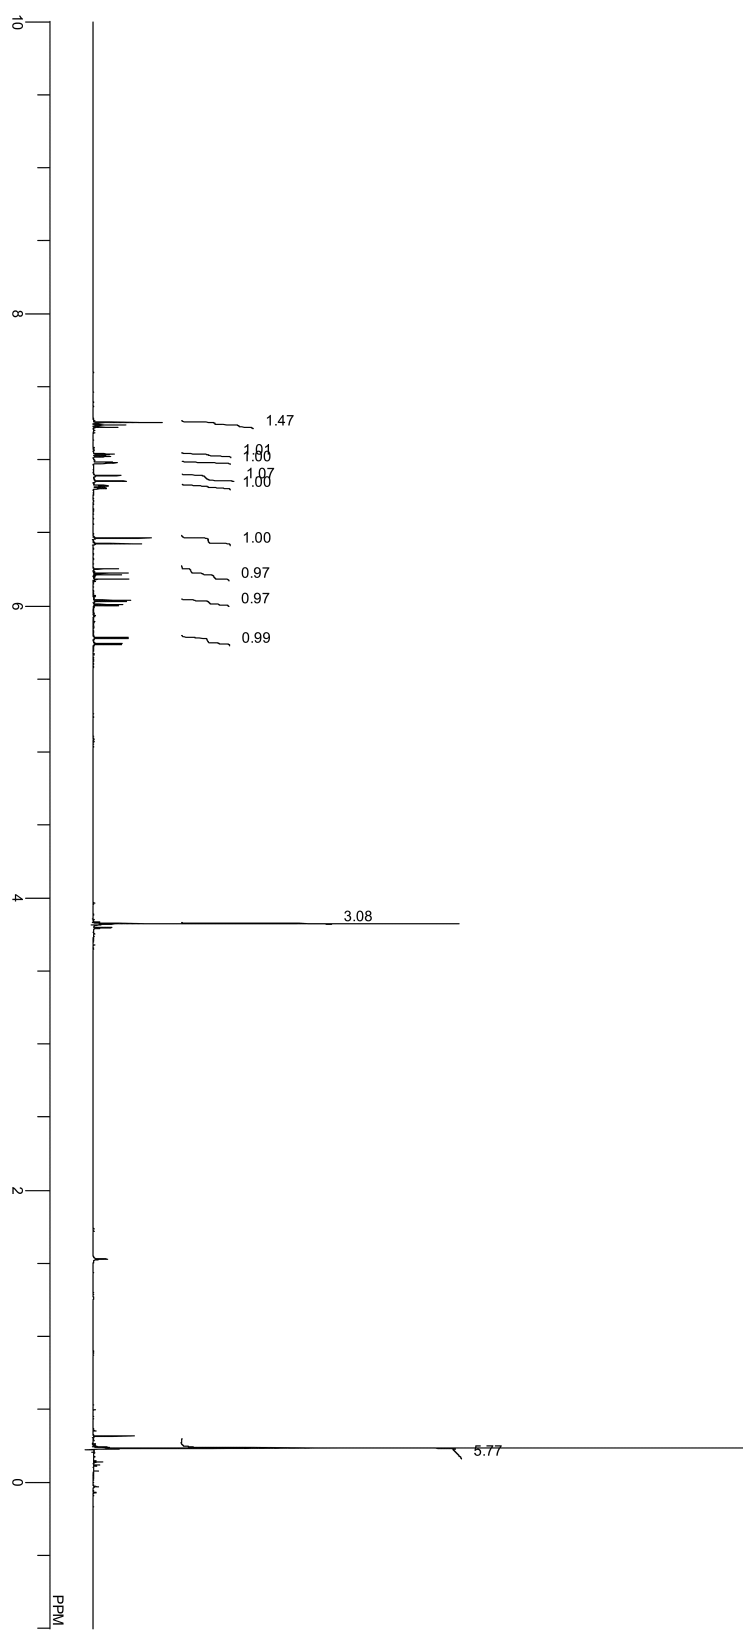

(498 MHz in CDCl<sub>3</sub>)

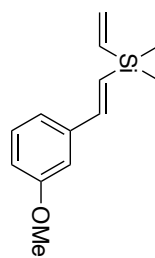

compound **1b**

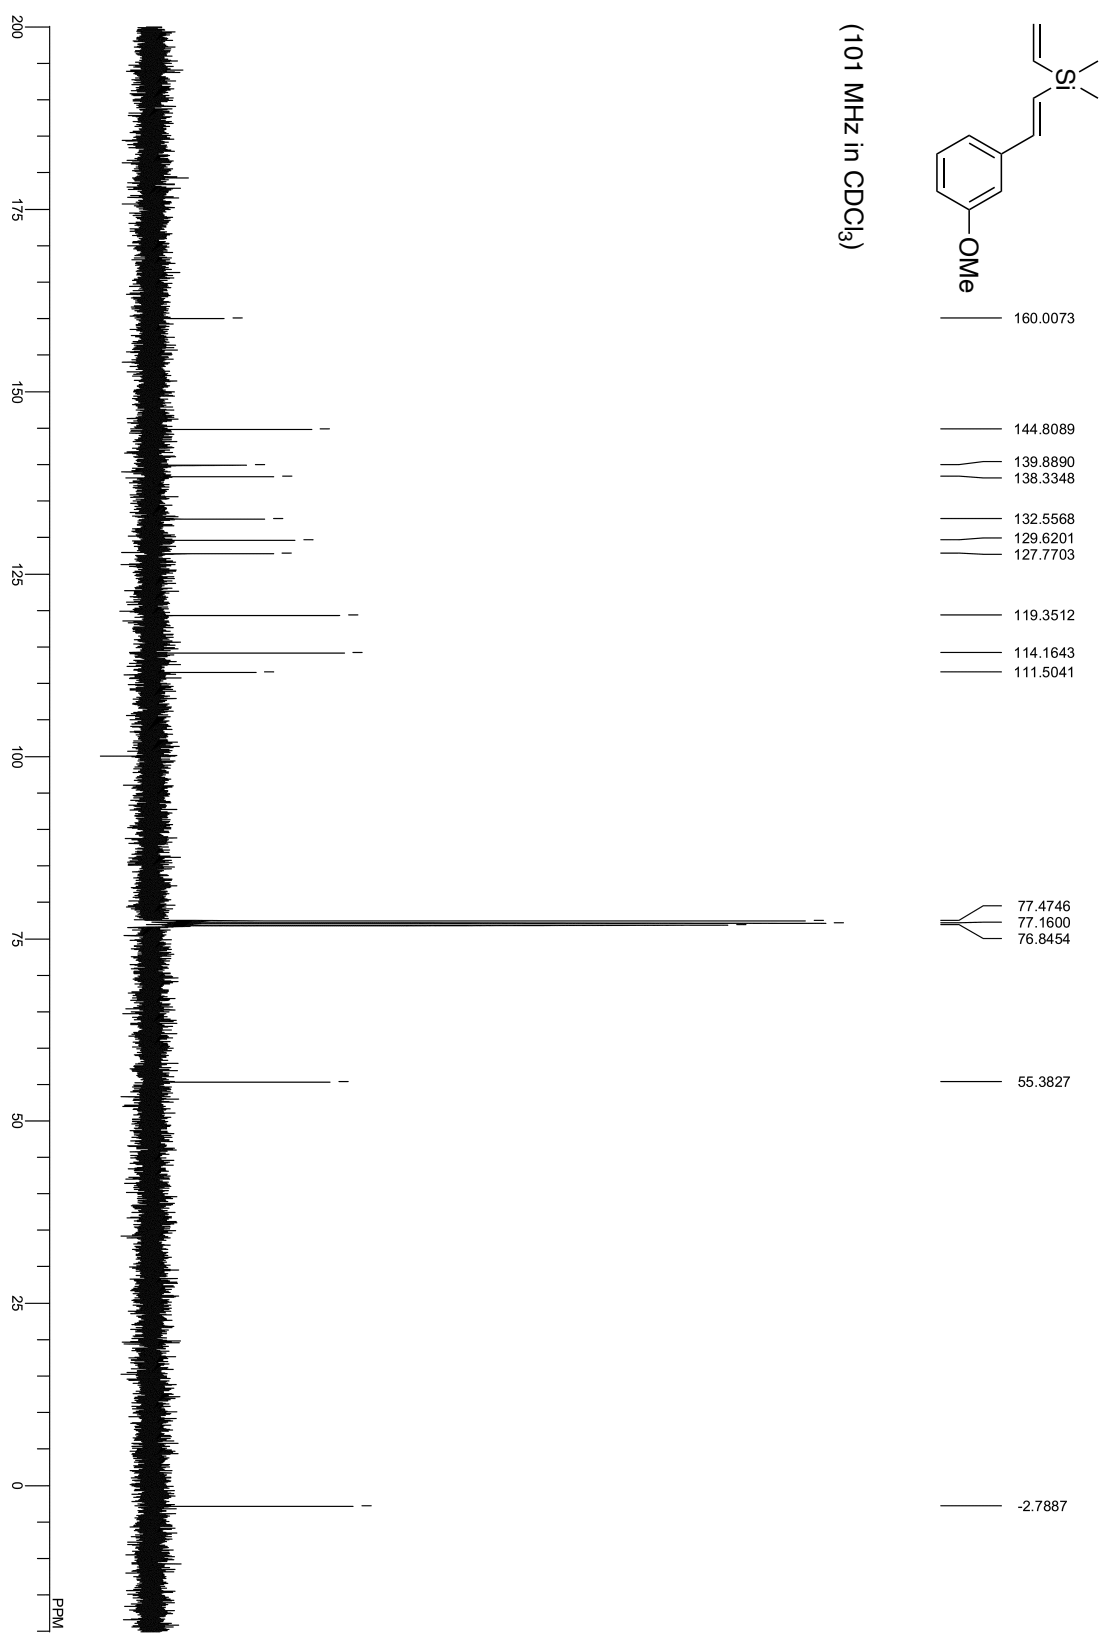



compound **1c**

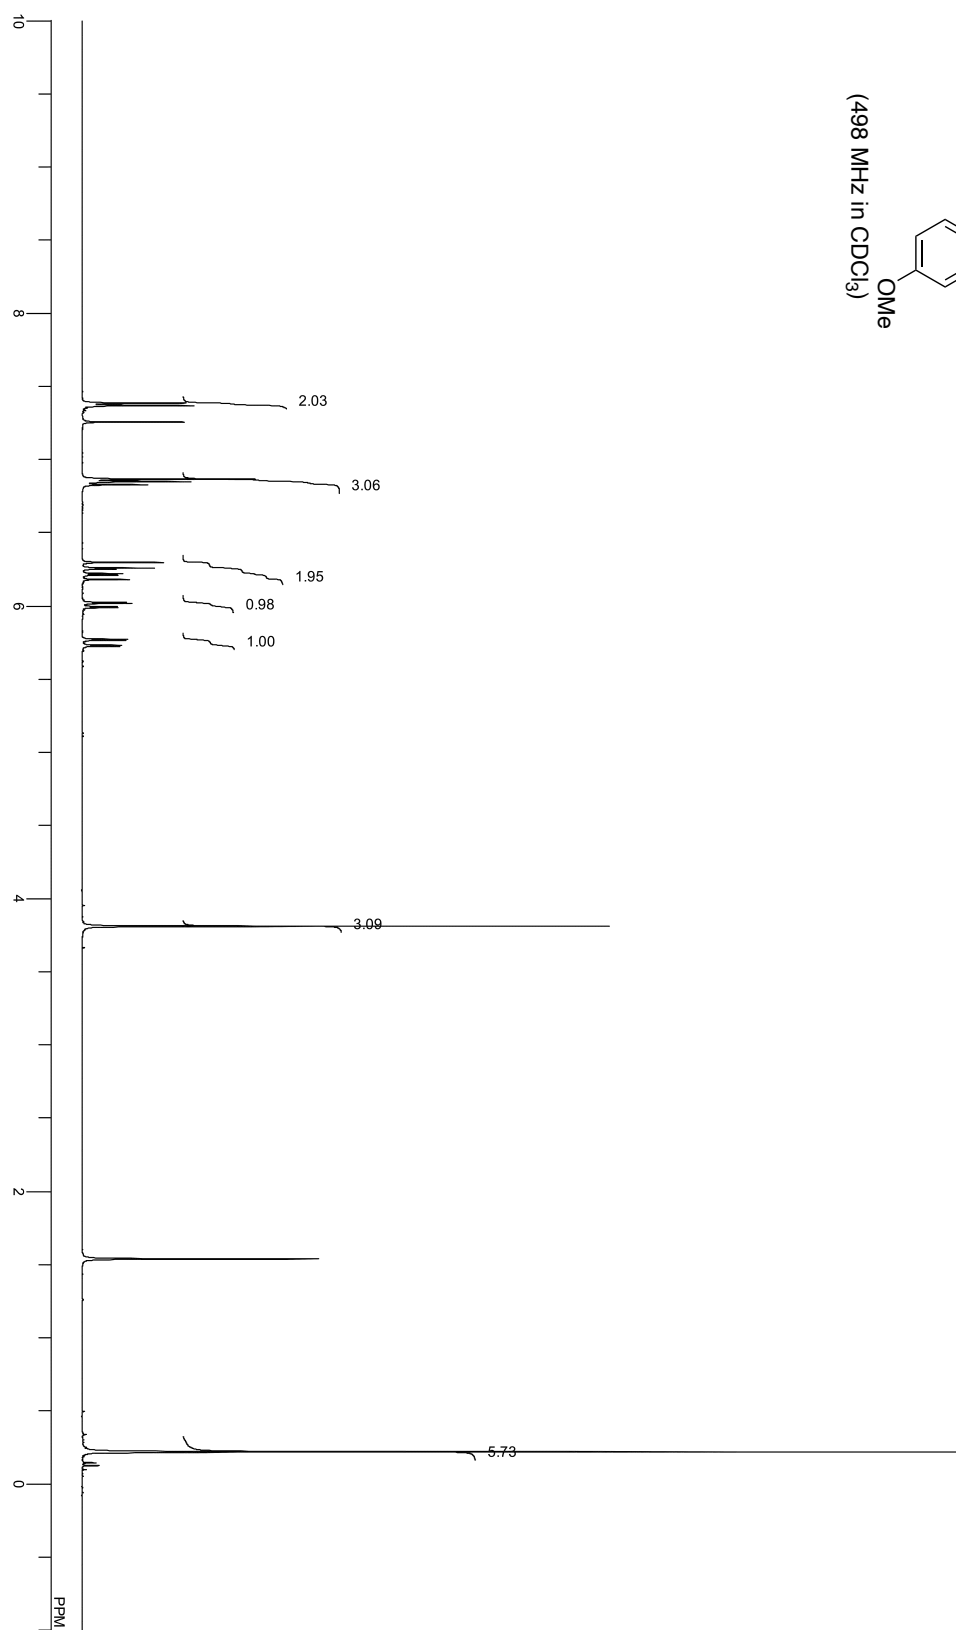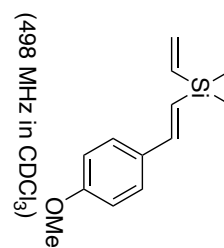

compound 1c

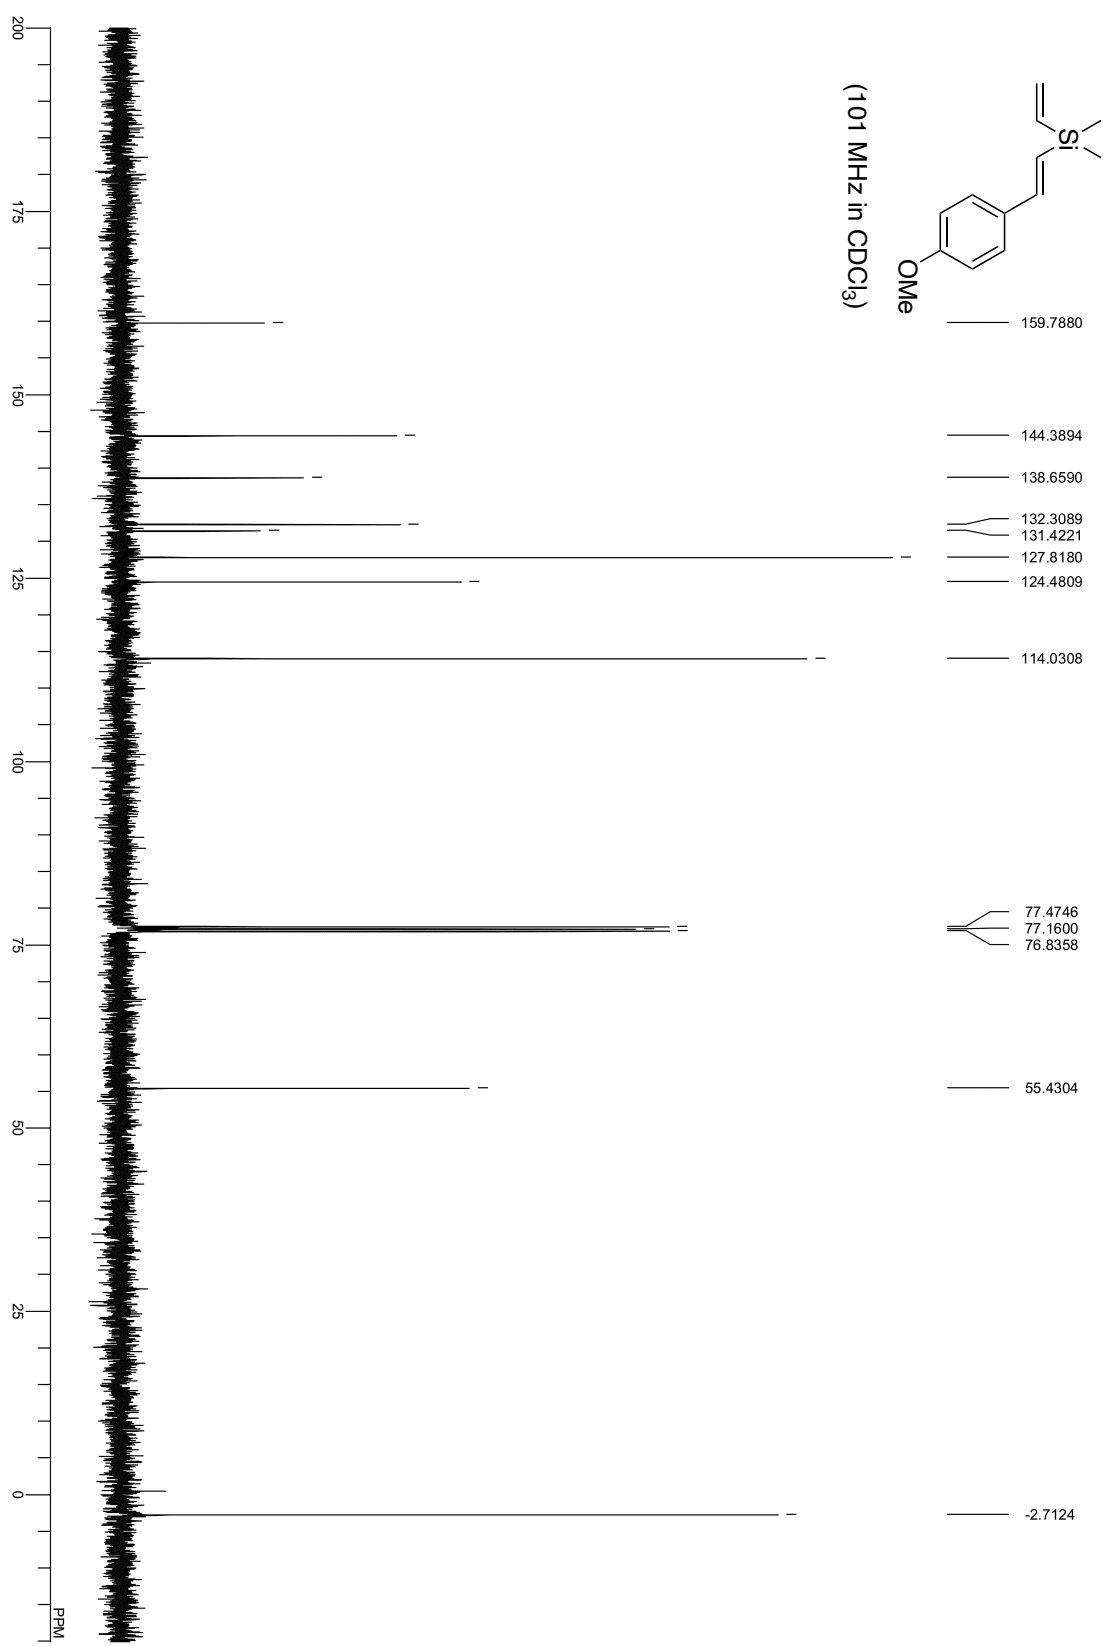

compound **1d**

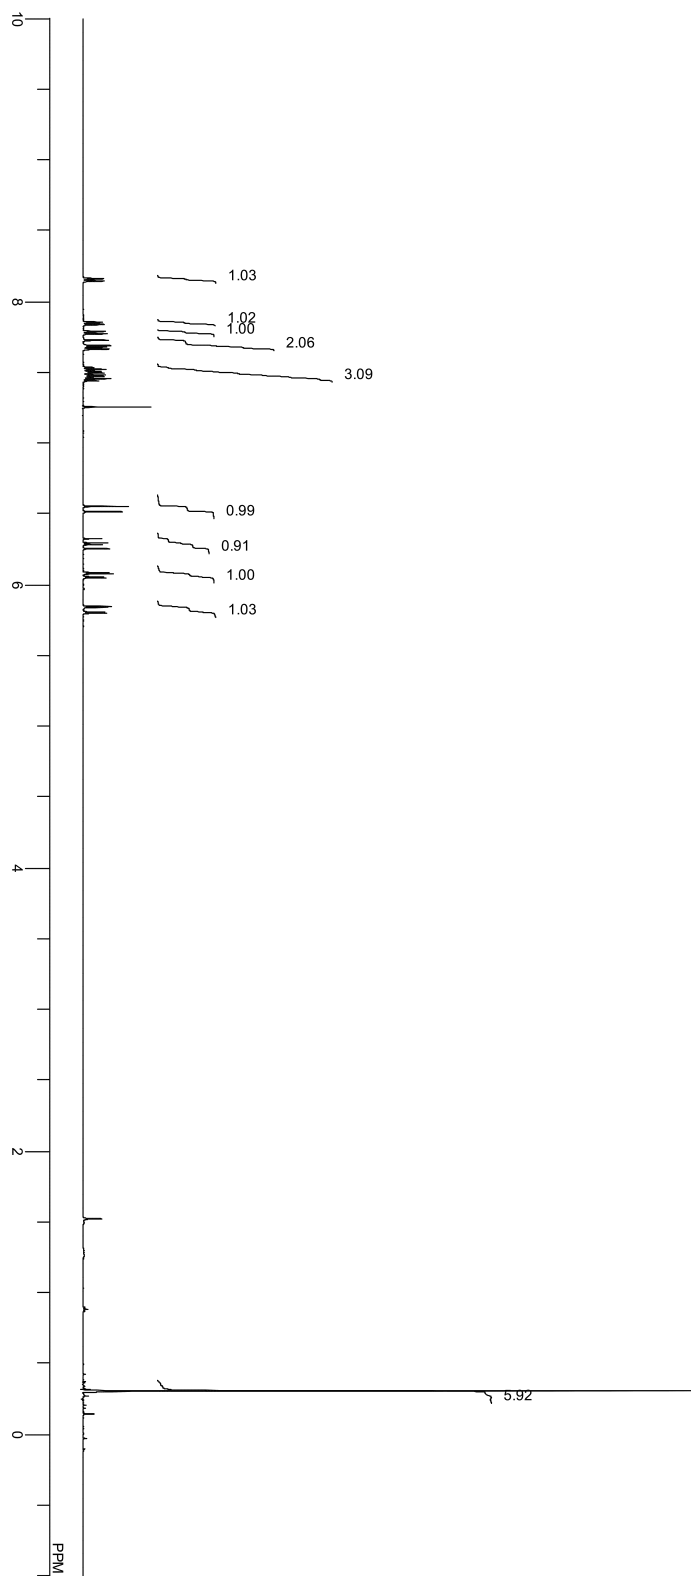

(498 MHz in CDCl<sub>3</sub>)

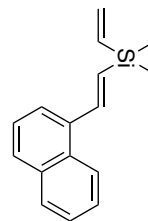

compound **1d**

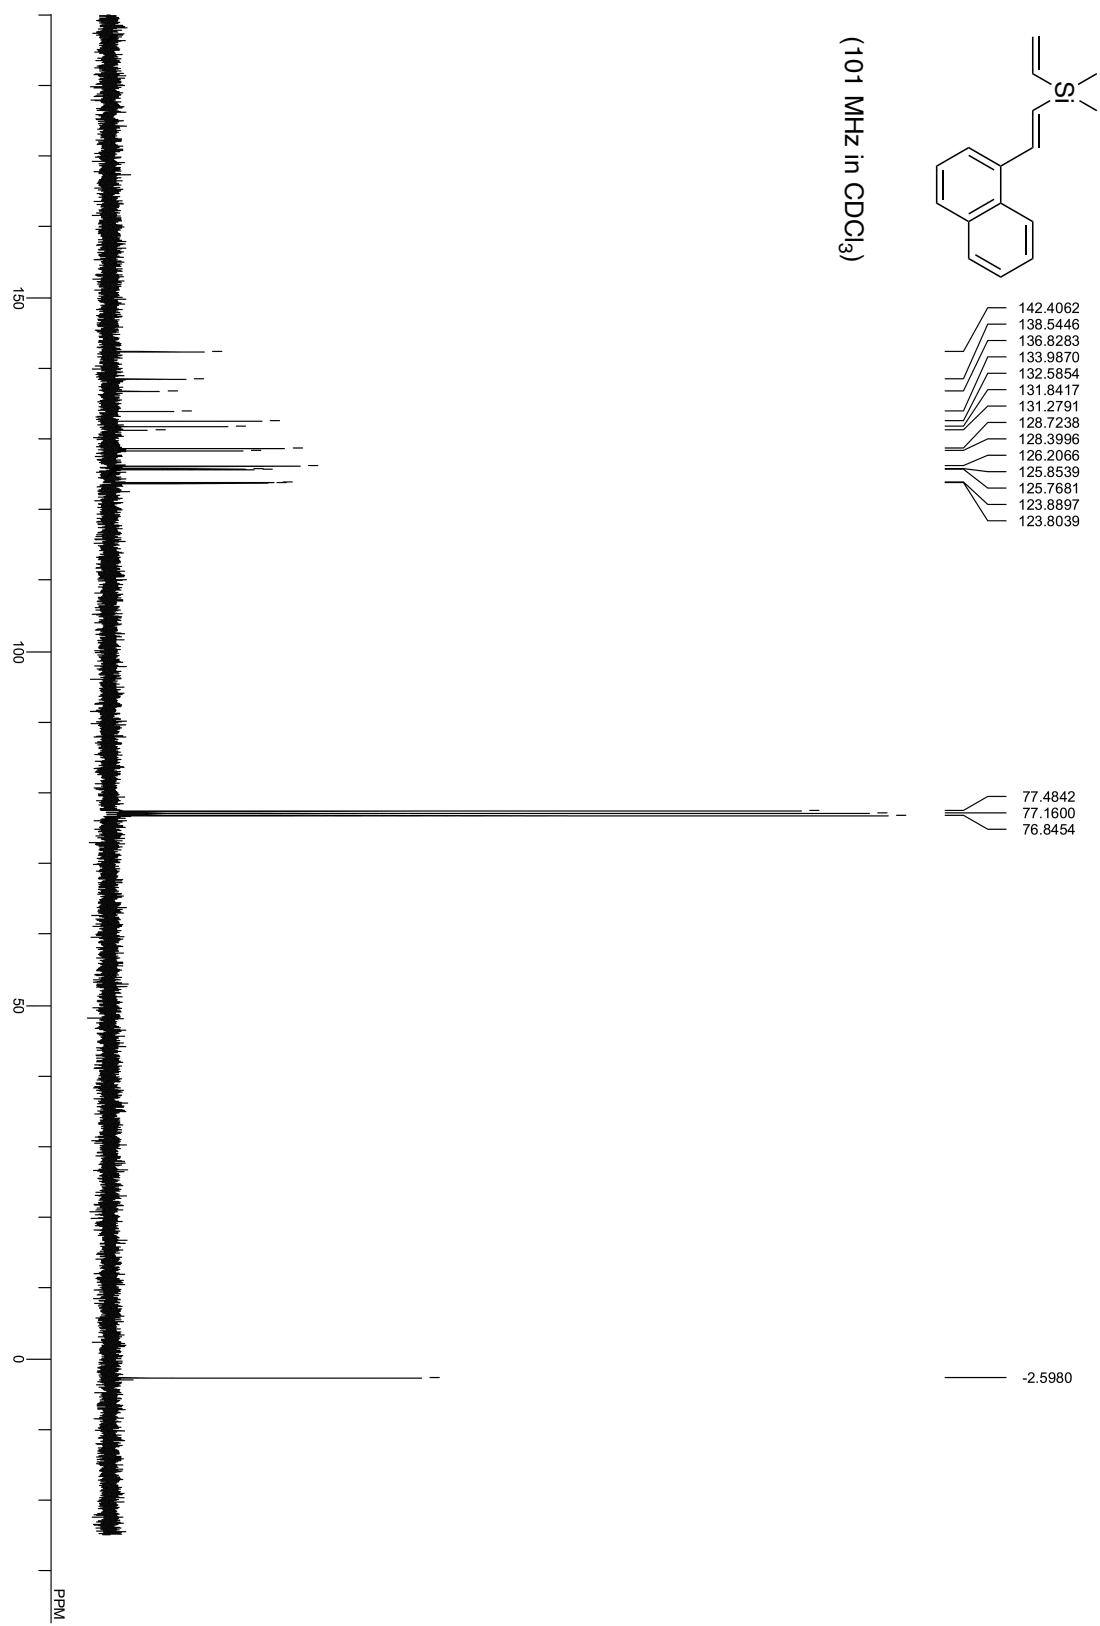

compound **1e**

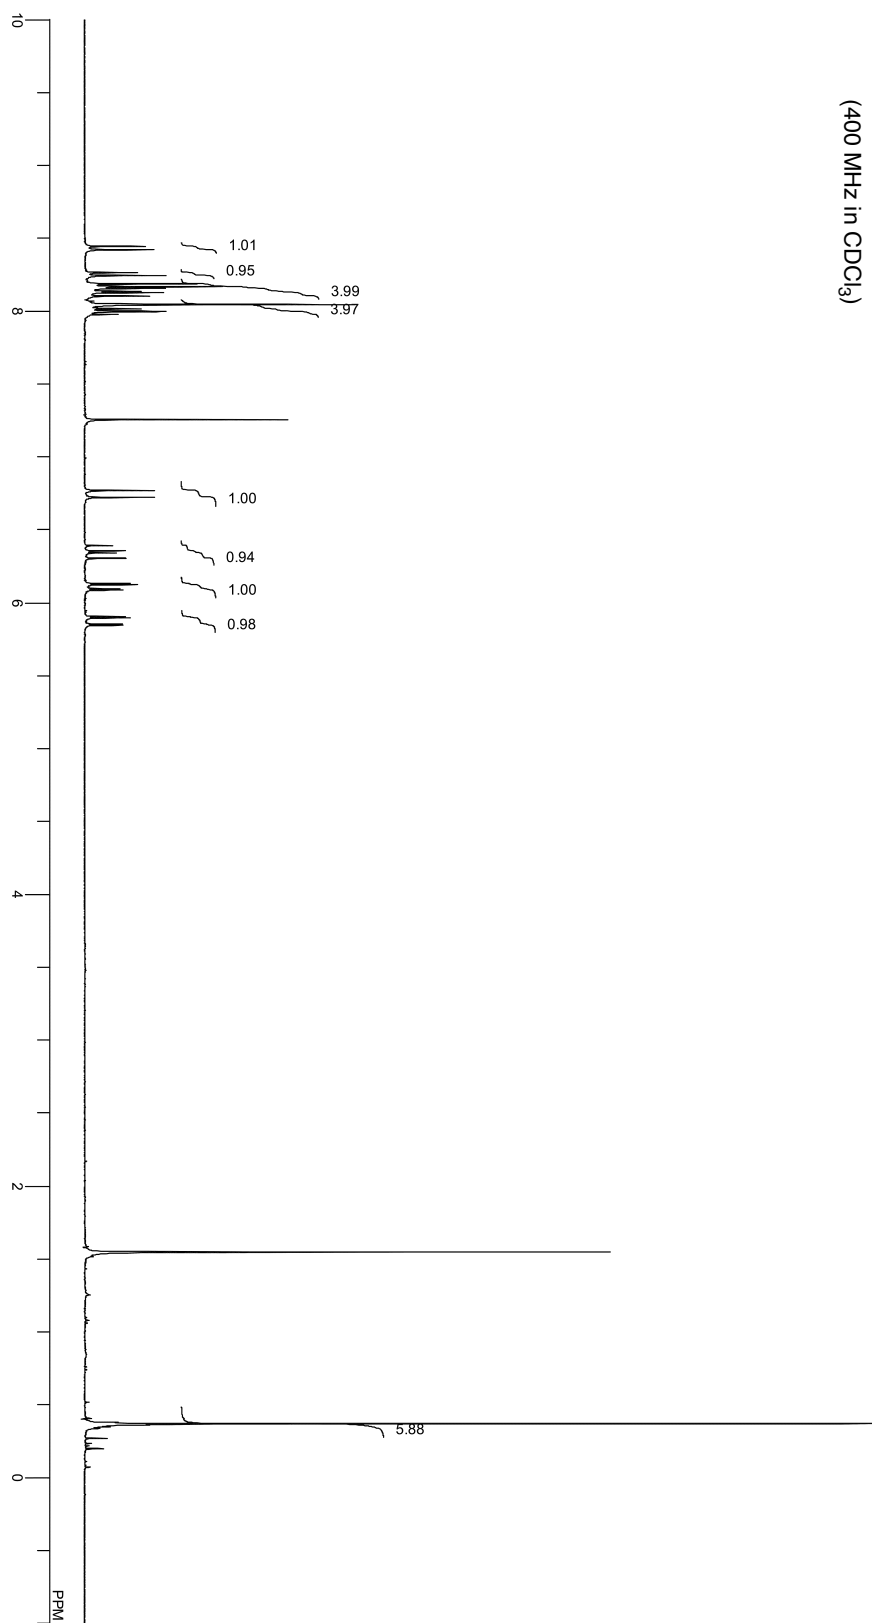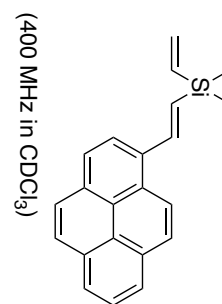

compound 1e

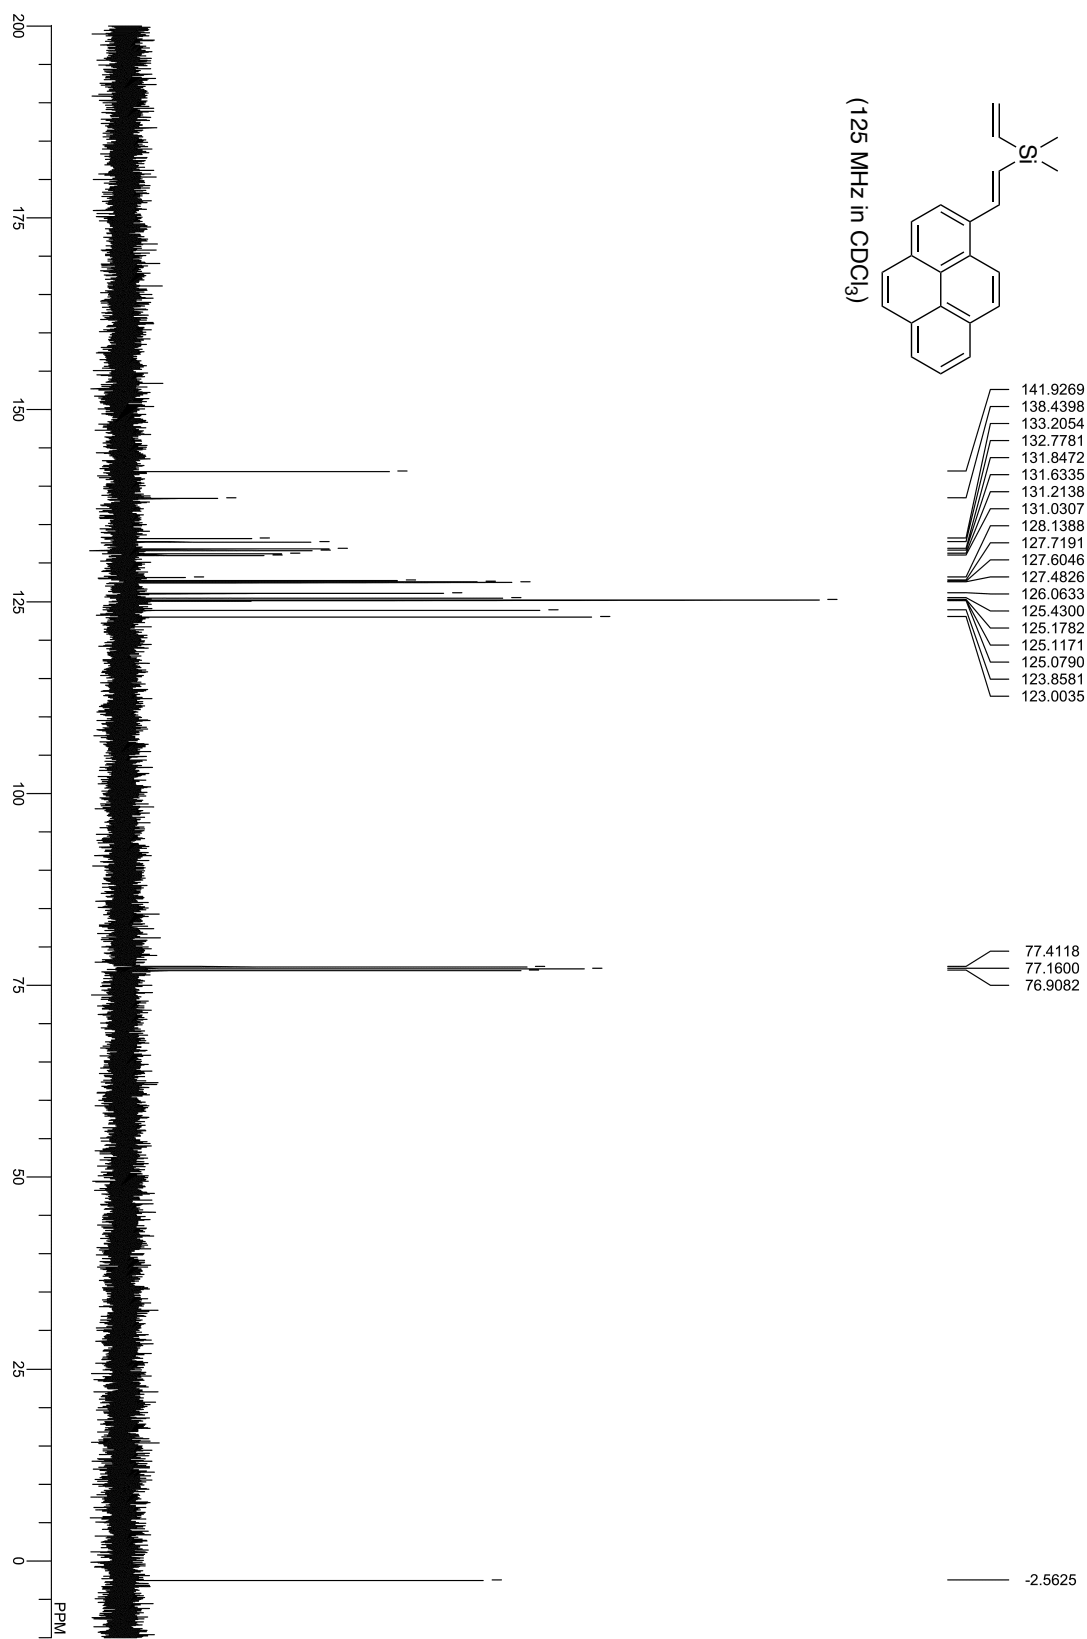

compound 2

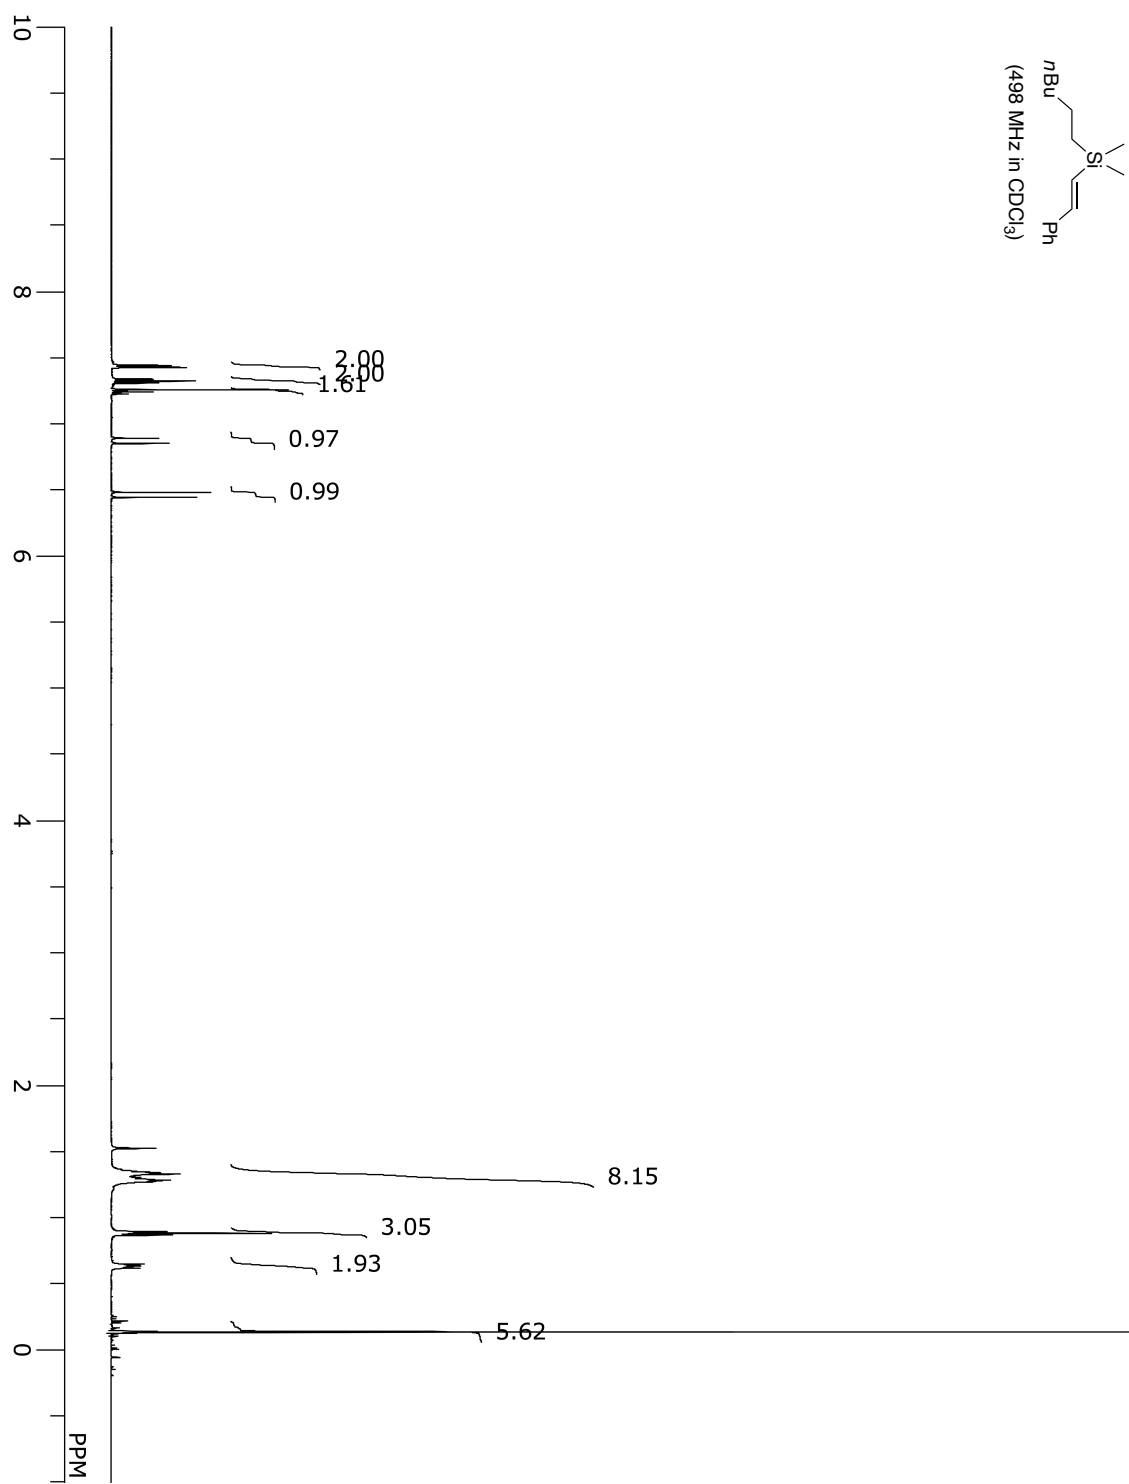

compound 2

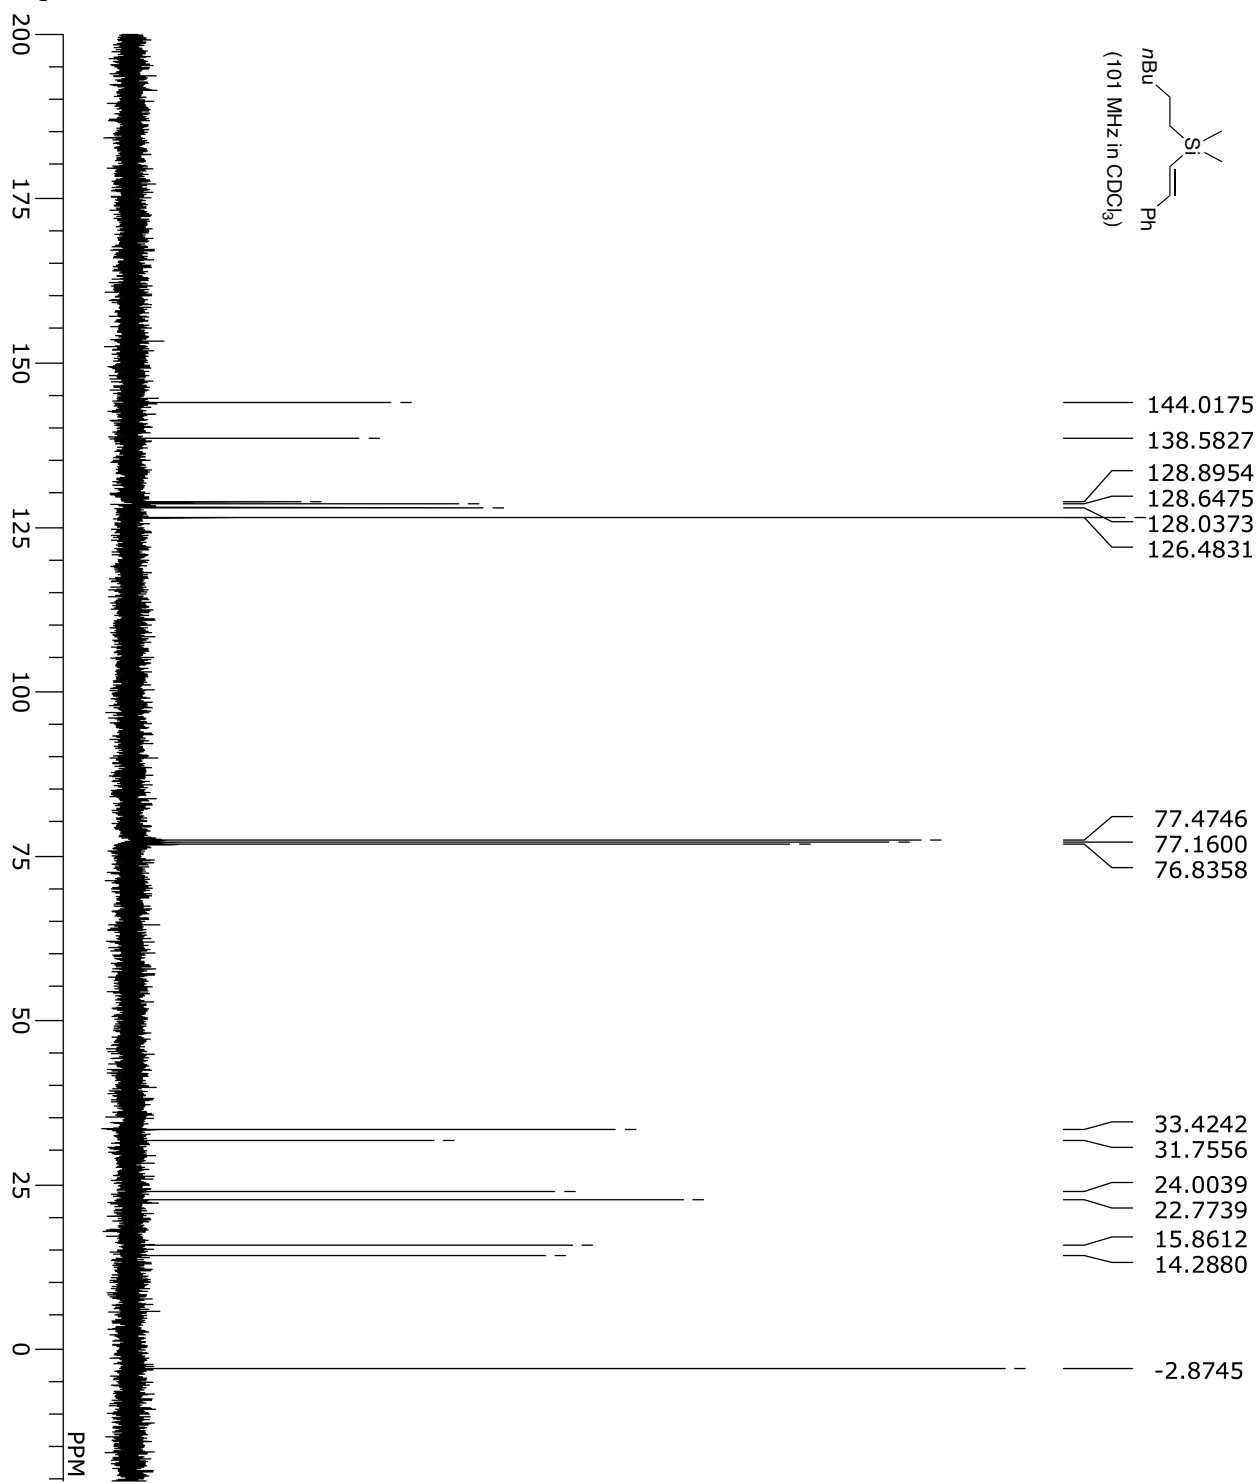



compound 3

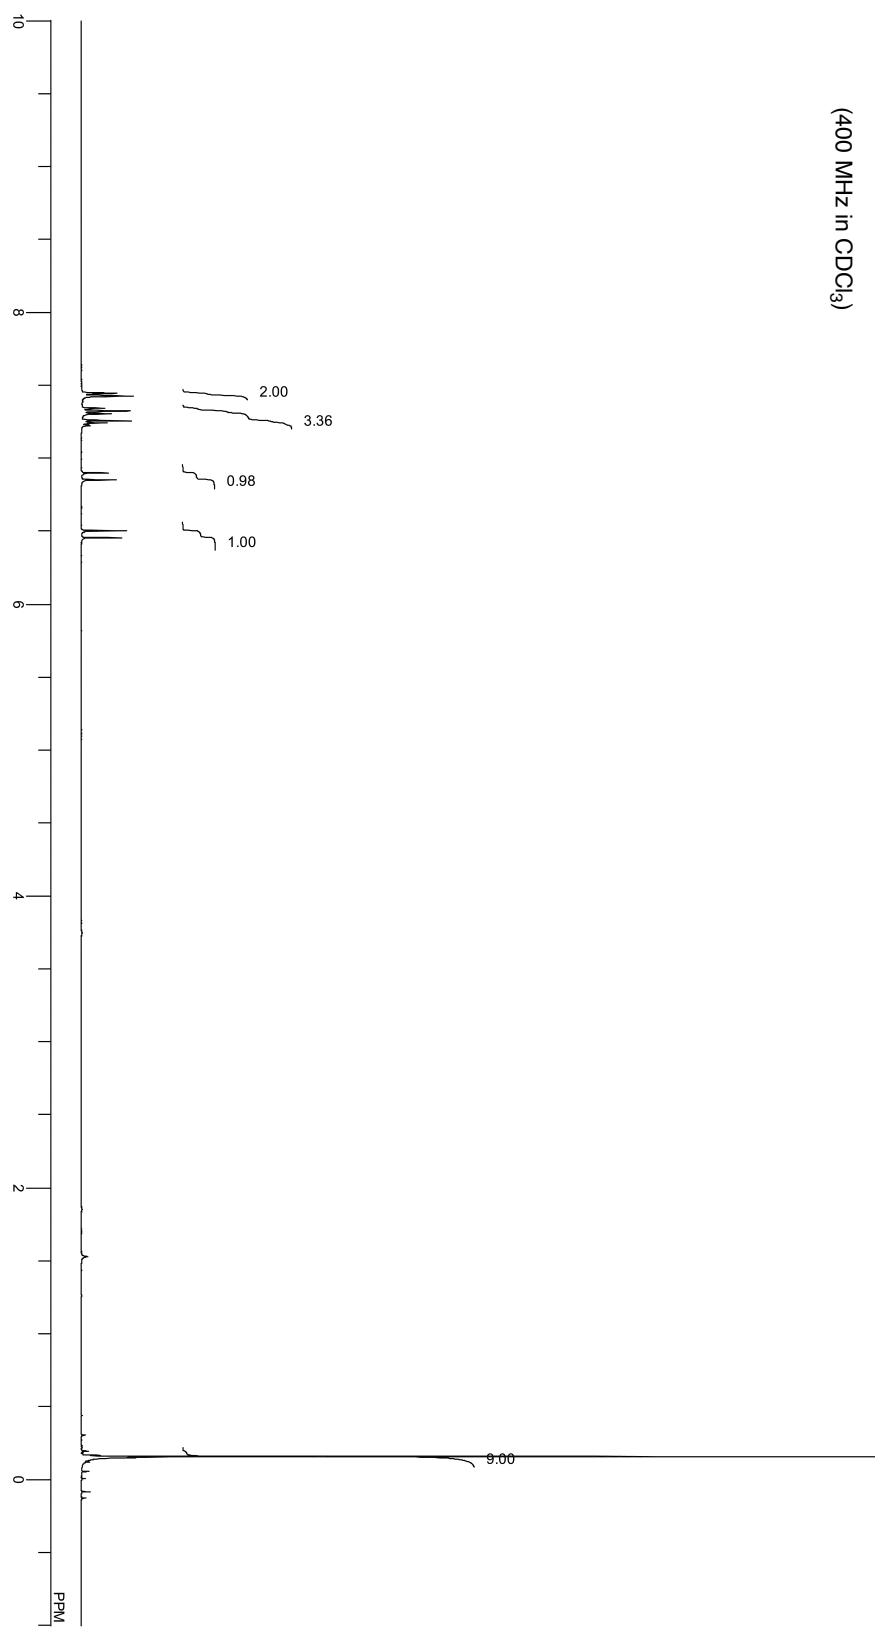

(400 MHz in CDCl<sub>3</sub>)

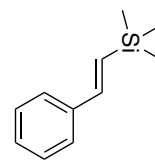

compound 3

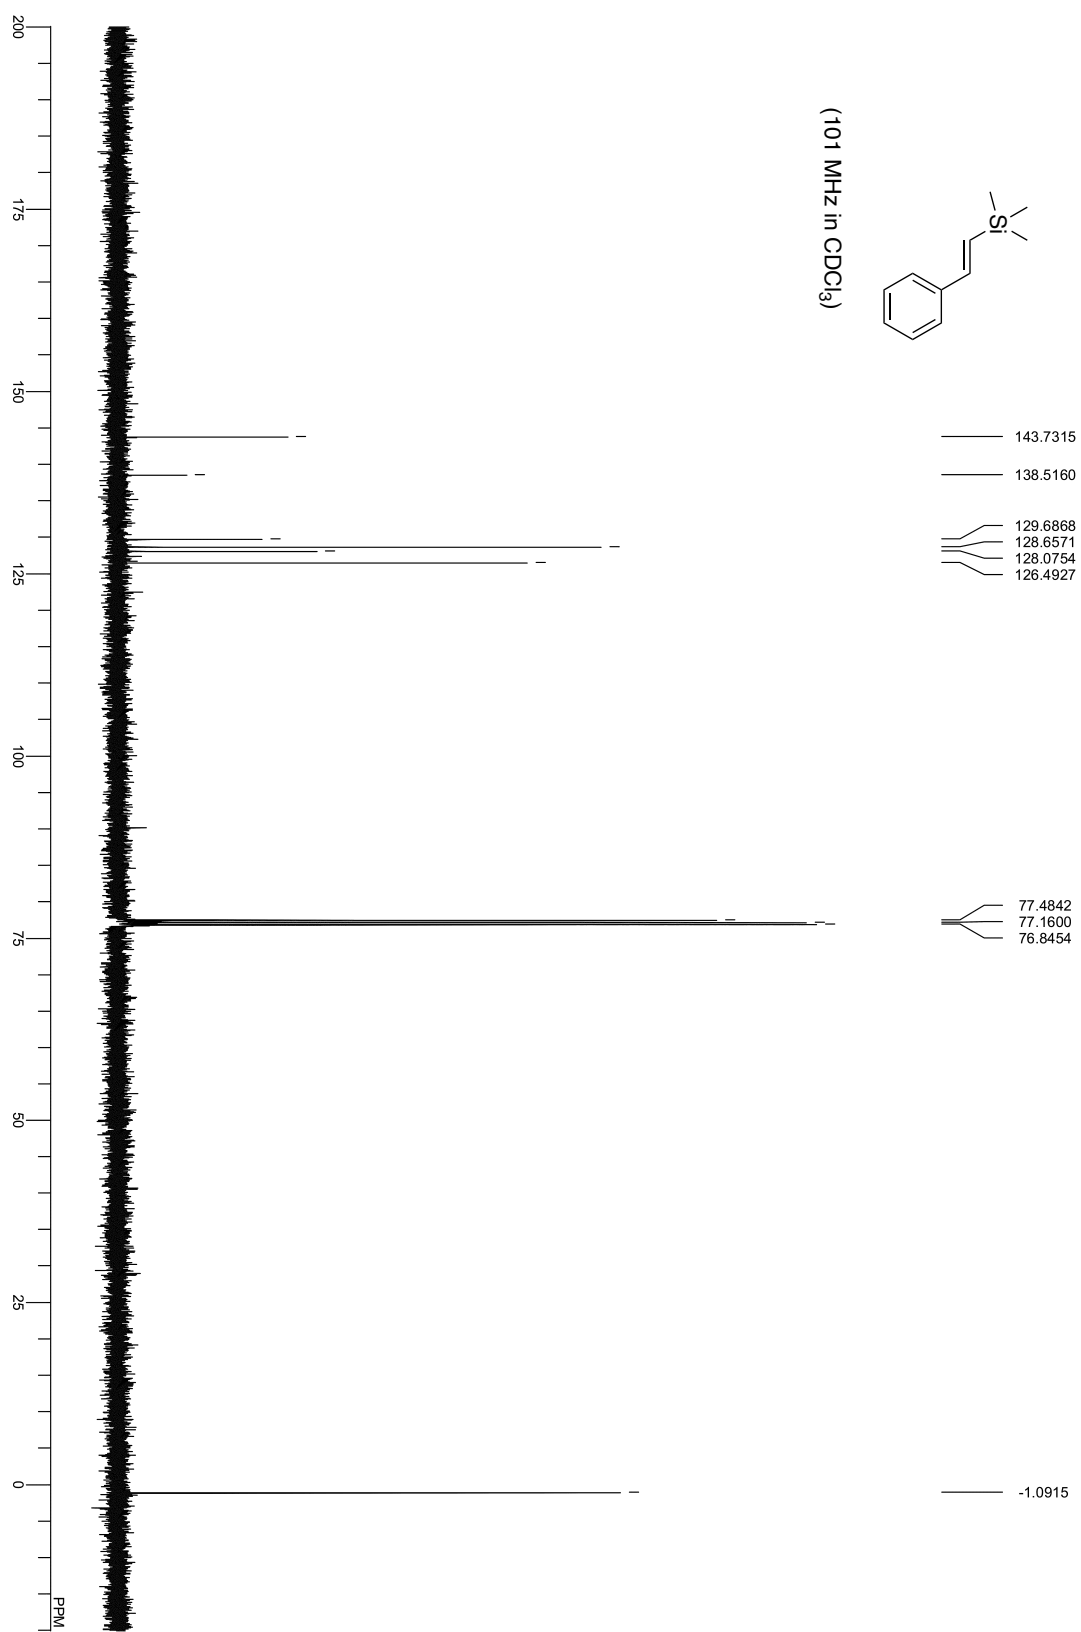

compound 4

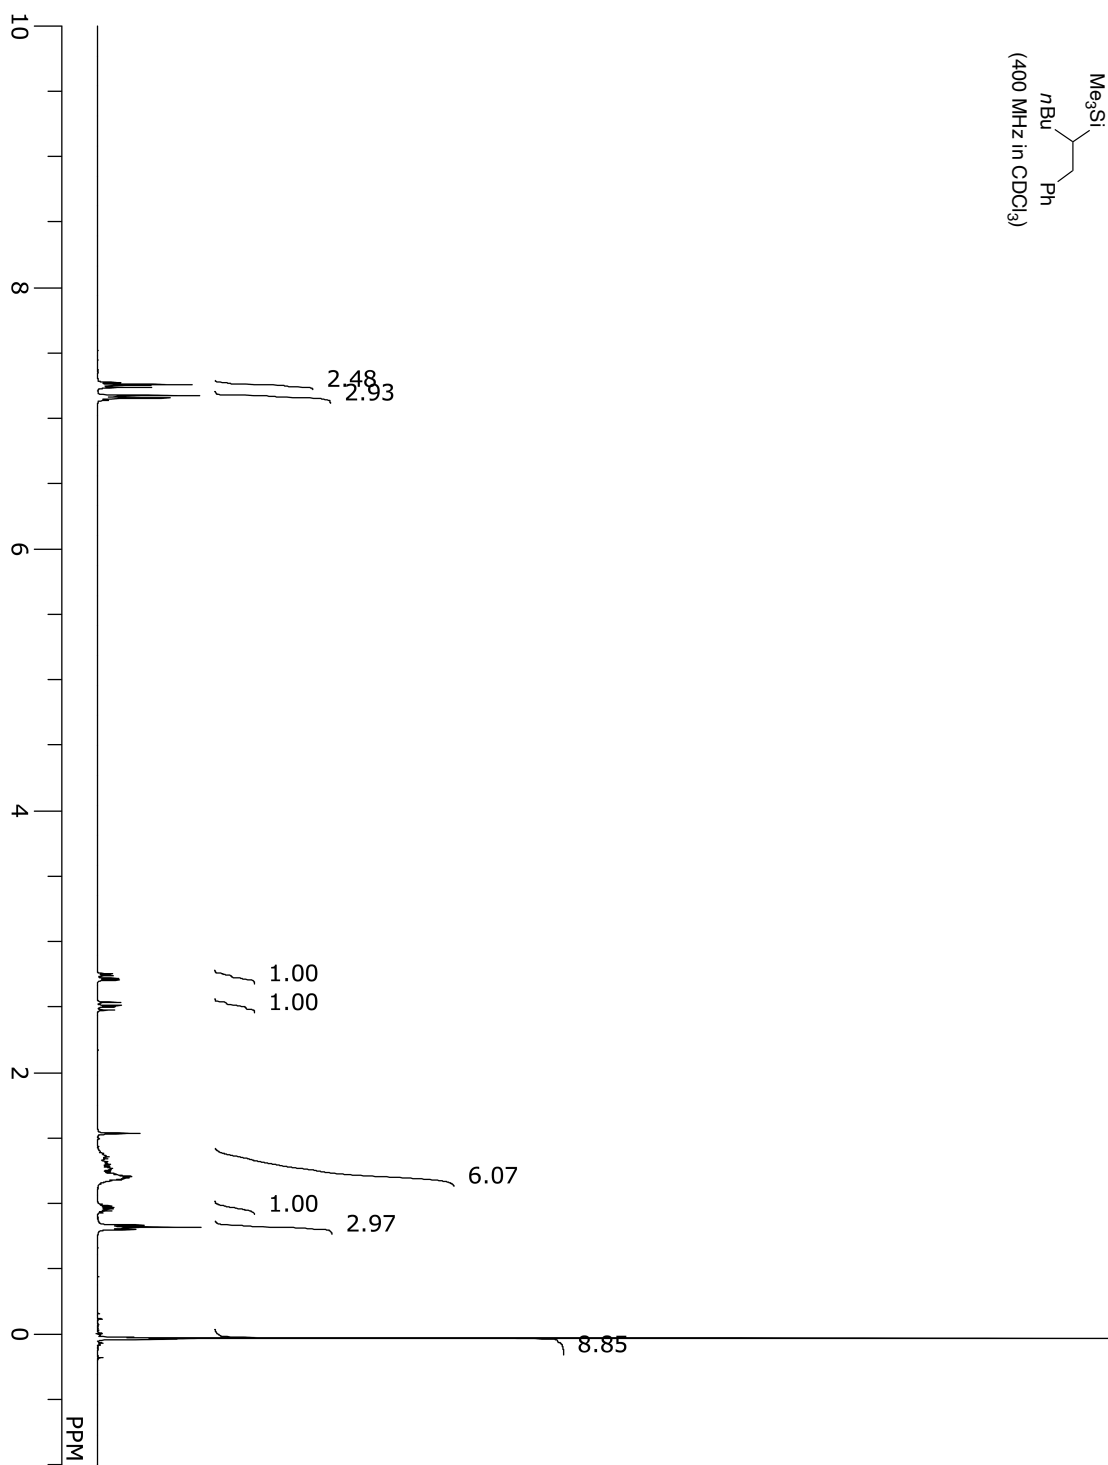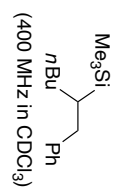

compound 4

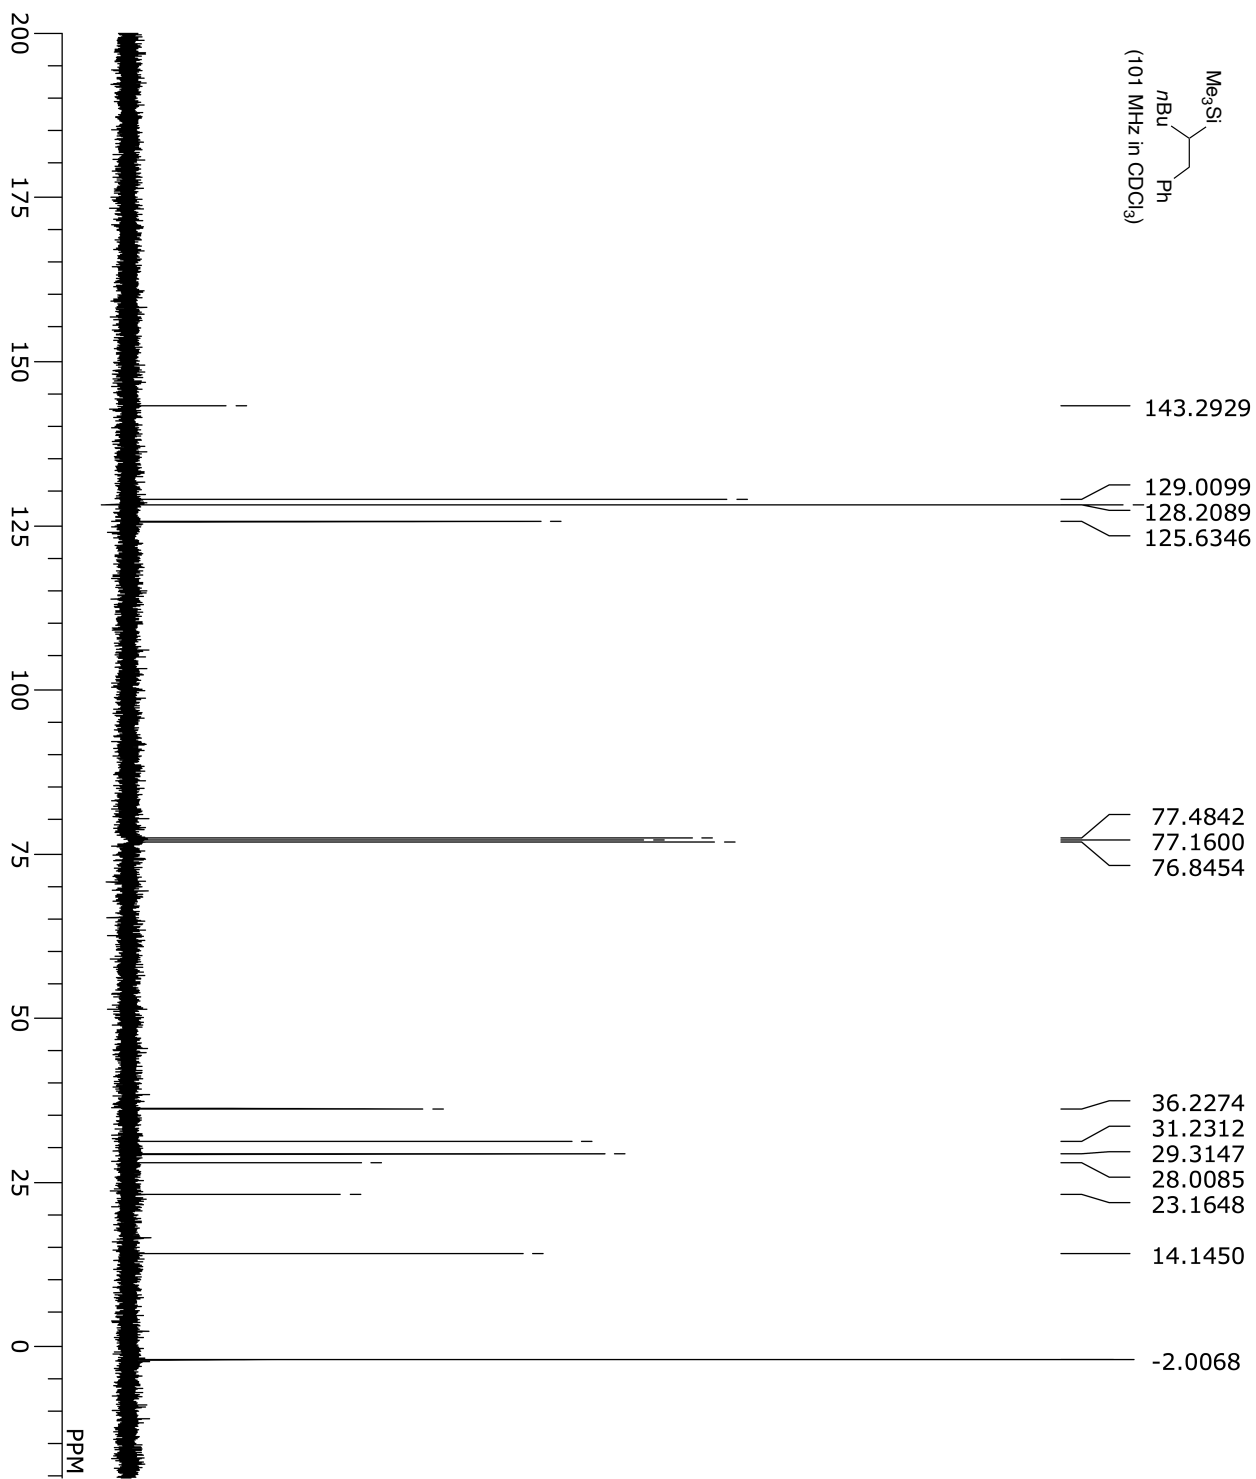

compound 6

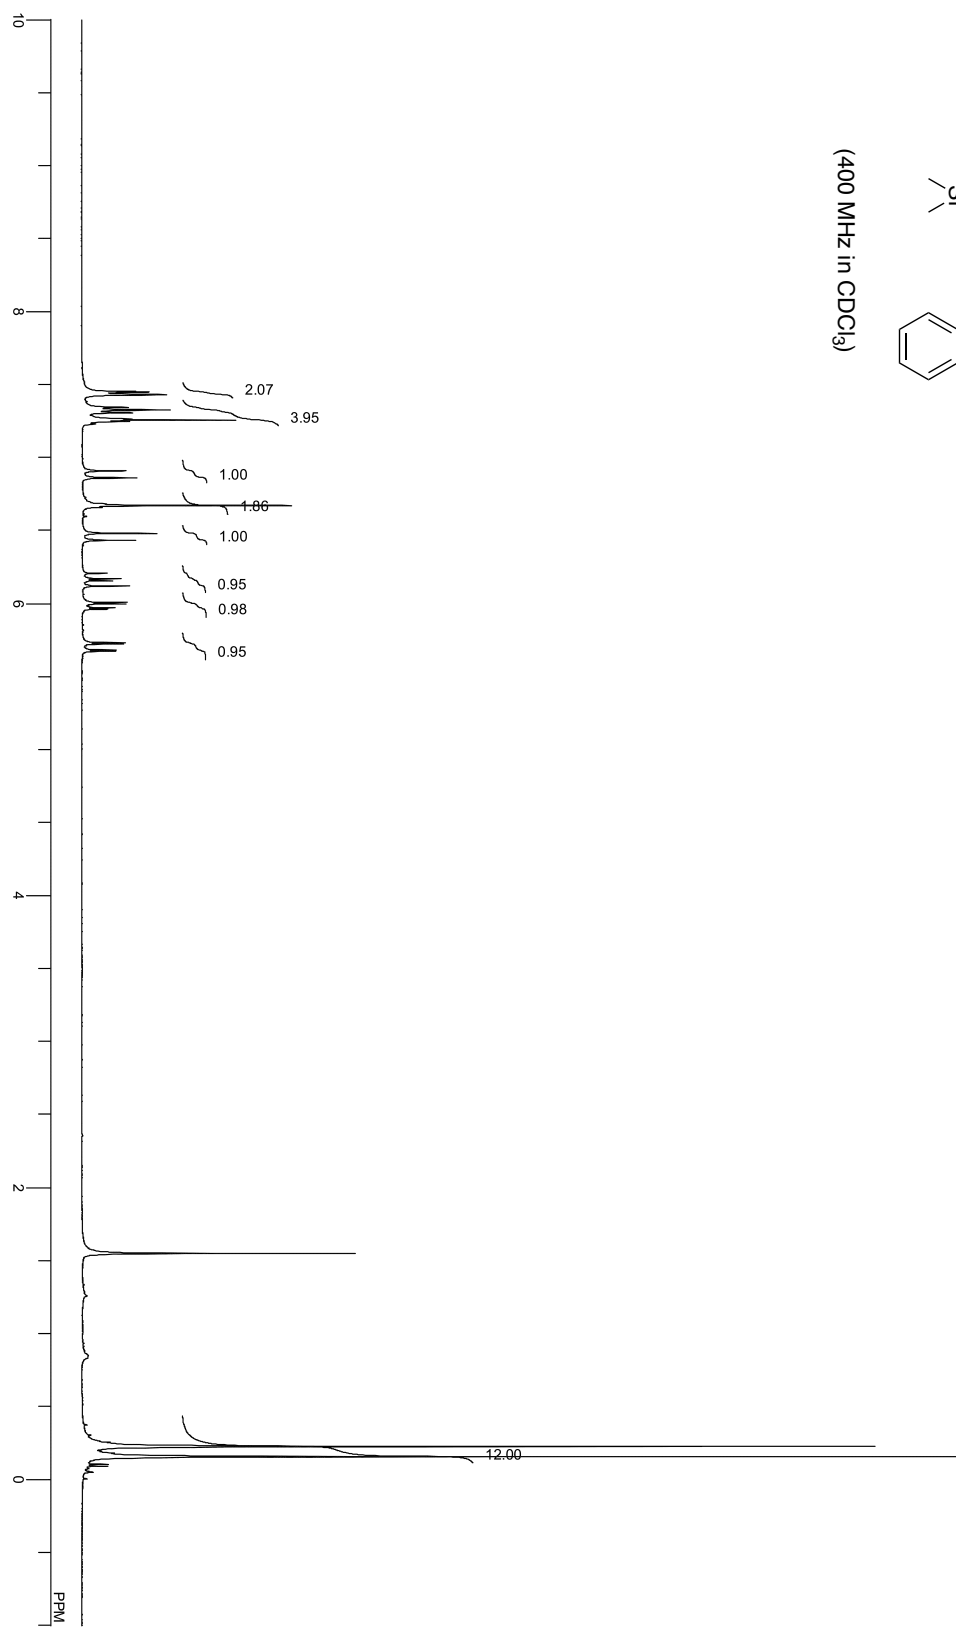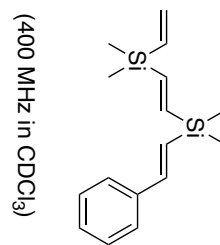

compound 6

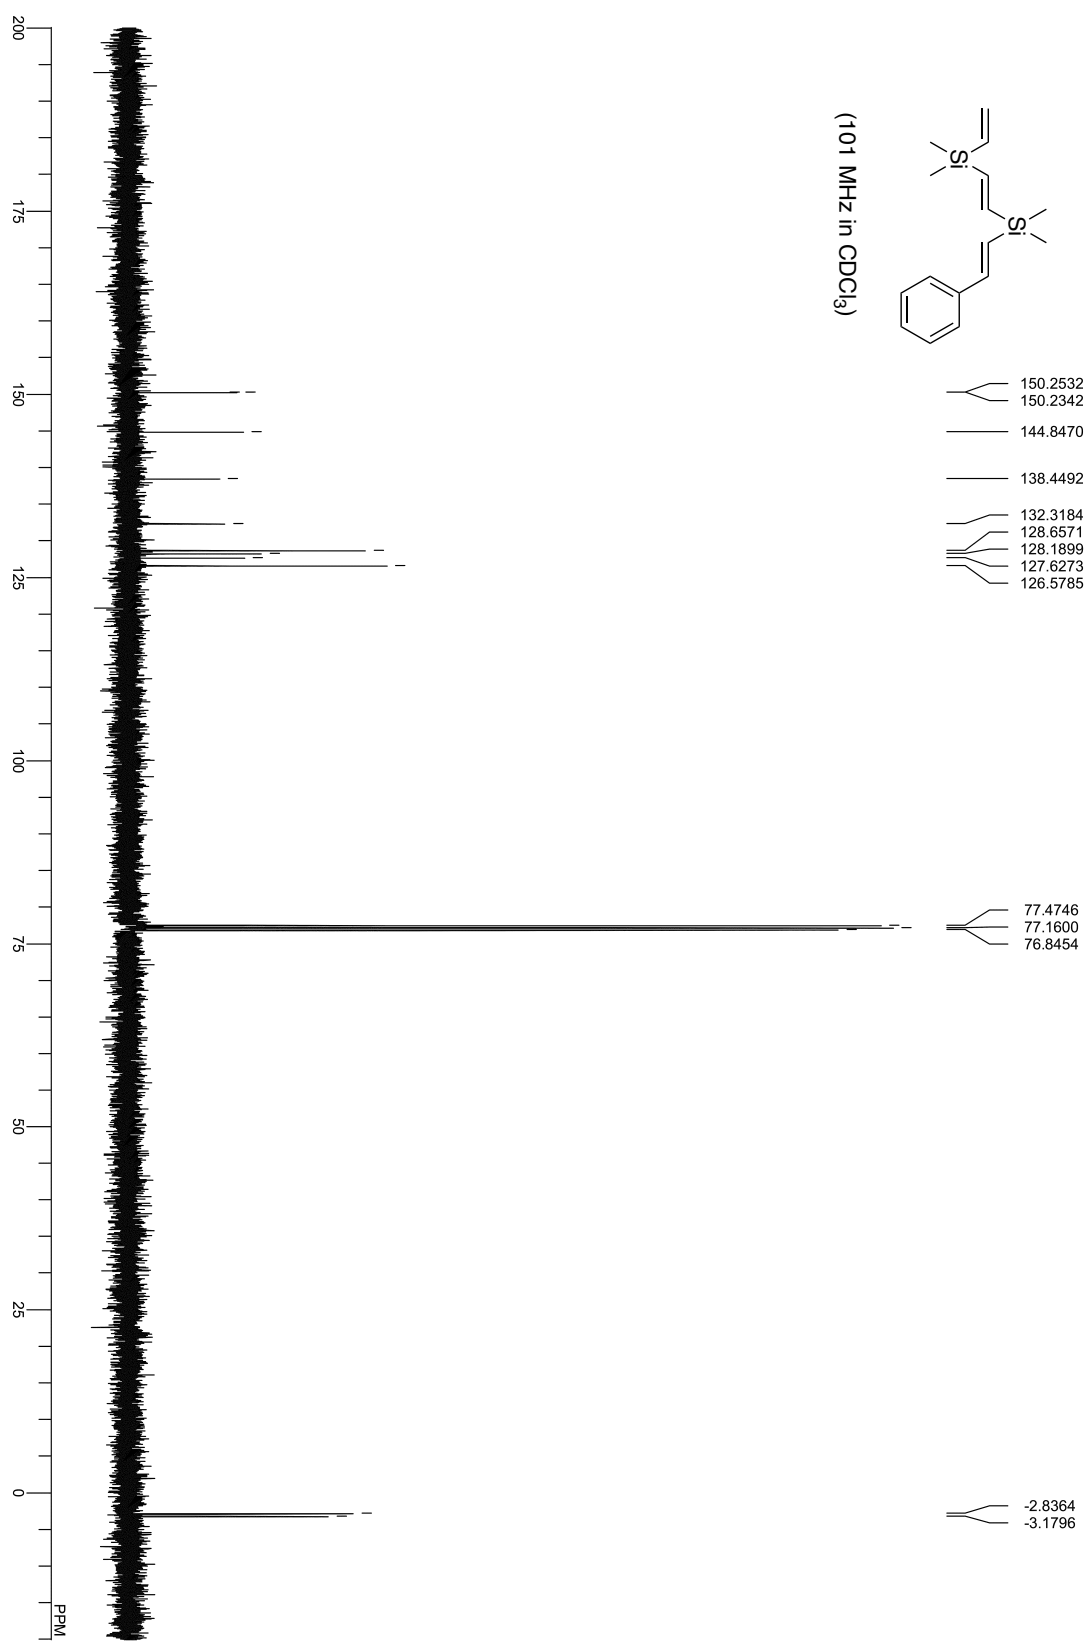

## VI. References

1. A. Ikeda, M. Omote, K. Kusumoto, A. Tarui, K. Sato and A. Ando, *Org. Biomol. Chem.*, 2015, **13**, 8886.
2. J. Oku, M. Takahashi, Y. Itoh, K. Shiraishi and M. Takaki, *Polym. J.* 1994, **26**, 79 and the references cited therein.
